# Supplementary material for: CD47 Activation by Thrombospondin-1 in Lymphatic Endothelial Cells Suppresses Lymphangiogenesis and Promotes Atherosclerosis
Source: PubMed Central journal article supplement — Arterioscler Thromb Vasc Biol. 2023 Jun 1;43(7):1234–50. doi: 10.1161/ATVBAHA.122.318904 (PMC10281185; doi:10.1161/atvbaha.122.318904), 2023-06-01

## SUPPLEMENTAL MATERIALS

### **CD47 activation by thrombospondin-1 in lymphatic endothelial cells suppresses lymphangiogenesis and promotes atherosclerosis**

Bhupesh Singla<sup>1\*</sup>, Ravi Varma Aithbathula<sup>1</sup>, Naveed Pervaiz<sup>1</sup>, Ishita Kathuria<sup>1</sup>, Mallory Swanson<sup>1</sup>, Frederick Adams Ekuban<sup>1</sup>, WonMo Ahn<sup>2</sup>, Frank Park<sup>1</sup>, Maxwell Gyamfi<sup>1</sup>, Mary Cherian-Shaw<sup>2</sup>, Udai P Singh<sup>1</sup> and Santosh Kumar<sup>1</sup>

<sup>1</sup>Department of Pharmaceutical Sciences, College of Pharmacy, The University of Tennessee Health Science Center, USA and <sup>2</sup>Vascular Biology Center, Medical College of Georgia, Augusta University, USA.

**\*Corresponding Author:**

Bhupesh Singla, Ph.D.

Assistant Professor

881 Madison Ave, Room 446

Department of Pharmaceutical Sciences, College of Pharmacy

The University of Tennessee Health Science Center,

Memphis, TN 38163, USA

Phone: + 1 901-448-4135, Fax: + 1 901-448-3446

e-mail: [bsingla@uthsc.edu](mailto:bsingla@uthsc.edu)

## **Supplemental Materials and Methods**

### **Cell proliferation assay**

LEC proliferation was measured using Cell Proliferation Reagent WST-1 (Roche Diagnostics GmbH, Mannheim, Germany, 5015944001). Briefly, 10,000 cells/well were seeded in a 96-well plate. Next day, cells were pretreated with vehicle (PBS) or human recombinant TSP1 at indicated concentrations (Sigma-Aldrich, ECM002) in basal medium MV 2 media containing 0.5% FBS for 4 h and stimulated with human recombinant VEGF-C (100 ng/mL, Peprotech, Rocky Hill, NJ, 100-20CD). After given incubation times, 10  $\mu$ L WST-1 reagent was added to each well, and the plate was incubated at 37°C for an additional 3 h. Absorbance at 450 nm was measured using a Cytation 5 Reader (Biotek Instruments Inc., Winooski, VT). Absorbance at 690 nm was taken as a reference.

For determination of Ki67-positive cells, LEC-plated on coverslips were pretreated with vehicle or TSP1 (22 nM) for 4 h and stimulated with VEGF-C (100 ng/mL) for 24 h. Next, cells were fixed, permeabilized, blocked, and incubated with Ki67 primary antibody (Cell Signaling Technology, 9129, 1:100) overnight at 4°C. Cells on coverslips were then incubated with fluorescently-labeled secondary antibodies (Life Technologies Corporation) and mounted with DAPI containing Fluoromount-G. Images were captured using a Zeiss 710 inverted confocal microscope, and Ki67-positive cells counted using the NIH Image J software.

### **Cell Migration Assay**

LEC migration was investigated using Culture-Insert 2 Well 24 (ibidi USA, Inc., Fitchburg, WI, USA) as described previously <sup>1</sup>. Cells were pretreated with vehicle or TSP1 (11 nM & 22 nM) for 4 h and stimulated with VEGF-C (100 ng/mL) for 24 h at 37 °C. Images of wounds at 0 h were captured using an inverted EVOS™ FL Imaging System (Thermo Fisher Scientific). After 24 h of VEGF-C stimulation, cell layers were washed, fixed, permeabilized, stained with Alexa Fluor 488-phalloidin, and images were taken. Area of wounds at 0 h and 24 h were determined using the Image-Pro Plus software (Media Cybernetics, Bethesda, MD, USA). The percentage of wound closure was calculated.

In separate experiments, Boyden chamber assay was performed to investigate LEC migration in response to TSP1 treatment. Briefly, vehicle- or TSP1-pretreated LEC (4 h) were added to upper chambers of transwell inserts (20000 cells/well, 8  $\mu$ m pore membranes, Corning, NY, USA) in VEGF-C containing media in the presence or absence of TSP1, and the number of cells migrated to lower side of the membrane was quantified (16 h). Images of at least 5 random microscopic fields were captured.

### **Lymphangiogenesis Assay**

A Matrigel tube formation assay was done to investigate *in vitro* lymphangiogenesis <sup>2</sup>. Briefly, vehicle- or TSP1-pretreated LEC (20 000 cells/well) in basal medium MV 2 (0.5% FBS) containing VEGF-C with or without TSP1 were seeded onto solidified Matrigels and incubated for 6 h at 37°C in a humidified incubator with 5% CO<sub>2</sub>. Matrigels were stained with Alexa Fluor 488-phalloidin, and images were recorded using an inverted EVOS™ FL Imaging System (Thermo Fisher Scientific). The tube length and number of branching points were measured using the NIH ImageJ software.

To investigate *in vivo* lymphangiogenesis, eight- to ten-week-old wild-type mice were injected subcutaneously (*s.c.*) with 400  $\mu$ L of growth factor-reduced Matrigel premixed with

murine VEGF-C (100 ng/mL), VEGF-C + TSP1 (22 nM) + IgG control antibody (100 µg/mL, BioXcell, Lebanon, NH, BE0083), or VEGF-C + TSP1 + CD47 blocking antibody (100 µg/mL, BioXcell, BE0283). Mice were euthanized by isoflurane inhalation and cervical dislocation after 10 days of Matrigel implantation. Matrigel plugs were harvested and fixed in 10% neutral buffered formalin, and LYVE-1 immunostaining was performed on paraffin sections.

### **Cell Cycle Analysis**

Cells were pretreated with vehicle or TSP1 (22 nM) for 4 h and stimulated with VEGF-C (100 ng/mL). After 24 h of incubation, cells were washed, fixed and stained with FxCycle™ PI/RNase Staining Solution for 30 min in dark at room temperature. The samples were immediately analyzed using a NovoCyte Flow Cytometer (Agilent, Santa Clara, CA).

### **Quantitative real-time PCR**

Total cellular RNA from LEC was extracted using the IBI Tri-Isolate RNA Pure Kit (IBI Scientific, Dubuque, IA, USA) according to the manufacturer's protocol. High-Capacity cDNA Reverse Transcription Kit (Applied Biosystems, Carlsbad, CA, 4368814) was utilized to reverse transcribe RNA (500 - 700 ng) into complementary DNA. Quantitative real-time PCR was performed in a QuantStudio 3 Real-Time PCR System (Applied Biosystems) with Fast SYBR™ Green Master Mix (Applied Biosystems, 4385612) using gene-specific primers listed in **Table S2**. Relative gene expression was calculated with the  $2^{-\Delta\Delta C_t}$  method using GAPDH as an internal control.

### **Reactive oxygen species generation**

2',7'-Dichlorofluorescein diacetate (Sigma-Aldrich, D6883) was used to determine intracellular reactive oxygen species (ROS) production. Briefly, LEC-seeded in a 12-well plate were treated with vehicle or TSP1 (11 nM) for 60 min. Cells were then washed, incubated with serum-free media containing H2DCFDA (5 µM) for 30 min at 37°C and analyzed for fluorescence (Ex: 492 nm, Em: 525 nm) using a NovoCyte Flow Cytometer. Mean fluorescence intensity was used to compare ROS generation between groups.

### **Intracellular NO analysis**

Cells plated in a 96-well plate (20,000 cells/well) were pretreated with vehicle or TSP1 (22 nM) for 4 h and stimulated with VEGF-C for 1 h. After the incubation time, cells were washed and incubated with DAF-FM diacetate solution (5 µM) for 45 min at 37°C. Then, cells were washed, incubated with fresh basal media without serum for 30 min, and fluorescence measured using excitation/emission spectra 495/515 nm with a Cytation 5 Reader (Biotek). Cells without the addition of DAF-FM diacetate solution were used to calculate background fluorescence.

### **Cytokine levels in mouse plasma samples**

Cytokine levels in mouse plasma samples were quantified using the LEGENDplex™ bead-based immunoassay (BioLegend, San Diego, CA, mouse inflammation panel) according to the manufacturer's instructions. Fluorescence intensities were measured using the BD FACSCalibur (BD Biosciences, San Jose, CA, USA) and analyzed using the LEGENDplex Data Analysis software (BioLegend). The cytokine levels are shown in pg/mL.

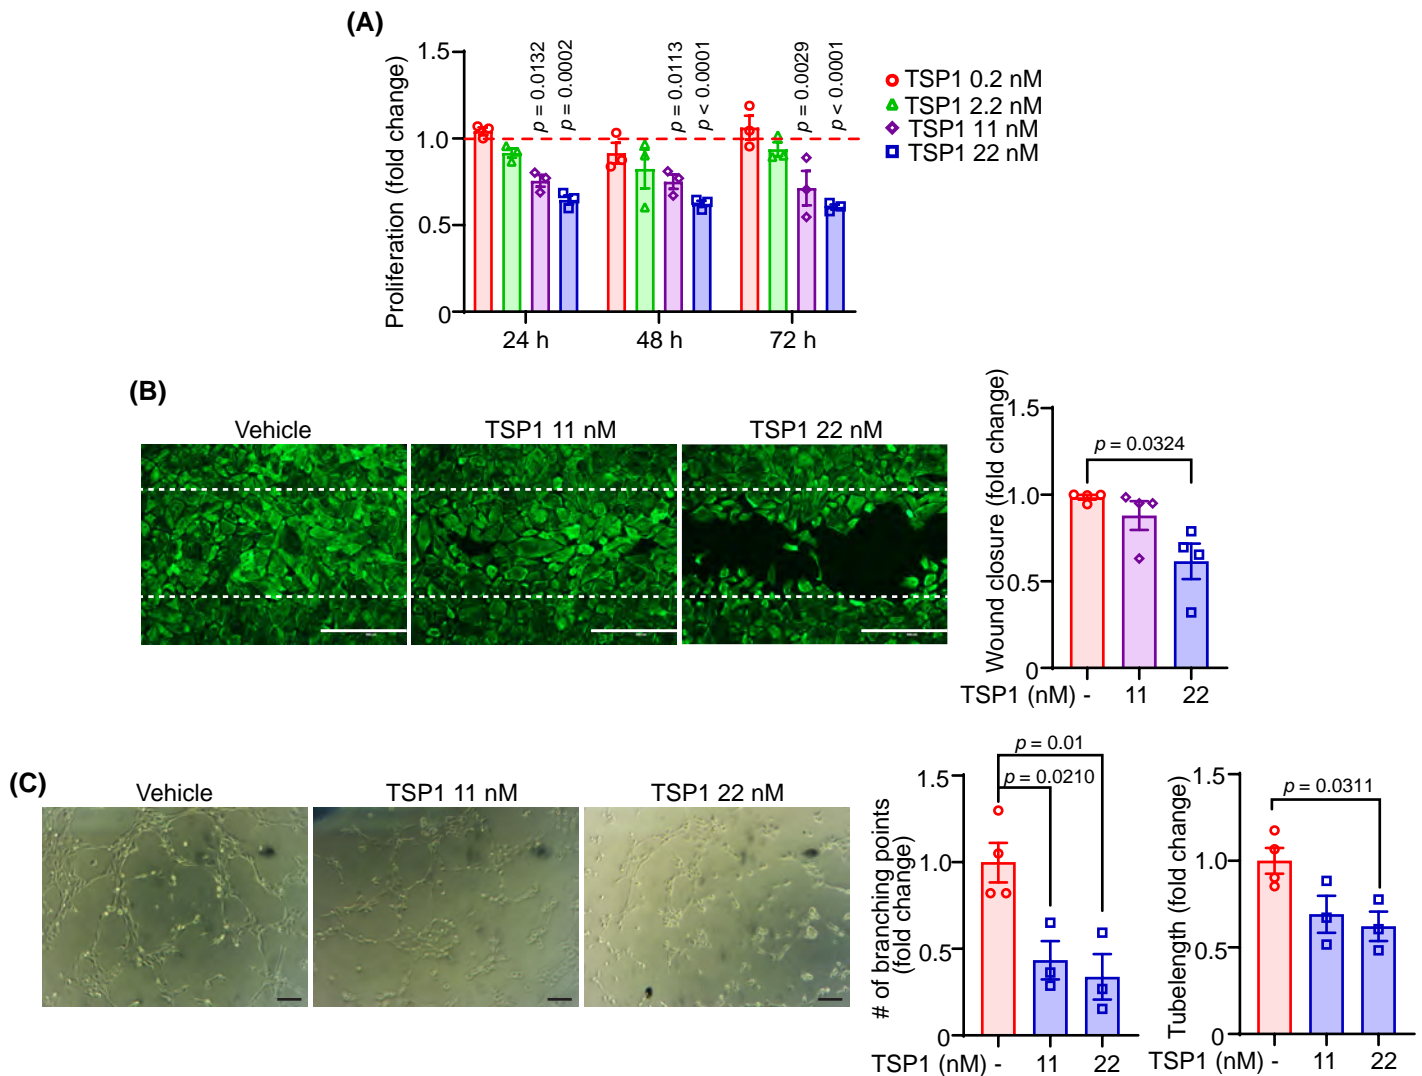

**Figure S1. TSP1 inhibits lymphangiogenesis in vitro.** **(A)** Human LEC were treated with vehicle or TSP1 (0.2 - 22 nM) for 4 h, stimulated with VEGF-C (100 ng/mL) for various time points, and cell proliferation investigated using WST-1 assay. The dotted red line indicates cell proliferation in control VEGF-C-stimulated cells. Data are representative of three independent experiments. The shown asterisks represent *P* values with respect to control. **(B)** LEC migration in response to TSP1 treatment after 24 h of VEGF-C stimulation ( $n = 4$ ). Scale bar 400  $\mu\text{m}$ . **(C)** Vehicle- or TSP1-treated LEC were seeded in wells of a Matrigel-coated plate in basal medium containing VEGF-C  $\pm$  TSP1 and tube formation determined after 6 h. Representative images of tube formation are shown. Scale bar 50  $\mu\text{m}$ . Images of random fields were captured, and tubelength and number of branching points quantified ( $n = 3 - 4$ ). Statistical analyses were performed using two-way ANOVA with Tukey's multiple comparisons test **(A)**, Kruskal-Wallis test **(B)** and one-way ANOVA with Dunnett's multiple comparisons test **(C)**. Data represent mean  $\pm$  SEM.

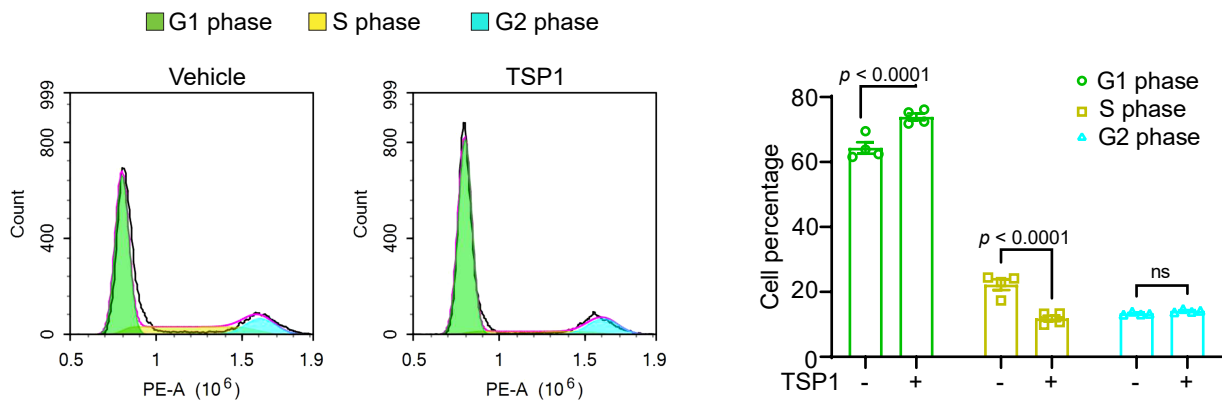

**Figure S2. TSP1 induces cell cycle arrest in LEC.** Human LEC were treated with vehicle or TSP1 (22 nM) for 4 h, stimulated with VEGF-C (100 ng/mL) for 24 h, and cell cycle analysis performed. Representative histograms indicating cells in G1, S and G2 phases are shown. Bar diagram shows cell percentage in various cell cycle phases ( $n = 4$ ). Statistical analyses were performed using two-way ANOVA with Sidak's multiple comparisons test. Data represent mean  $\pm$  SEM.

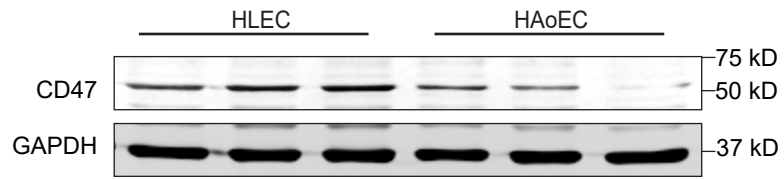

**Figure S3. CD47 protein expression in human LEC and human aortic endothelial cells.** Western blot images of CD47 (NBP2-31106) and GAPDH protein expression are shown ( $n = 3$ ).

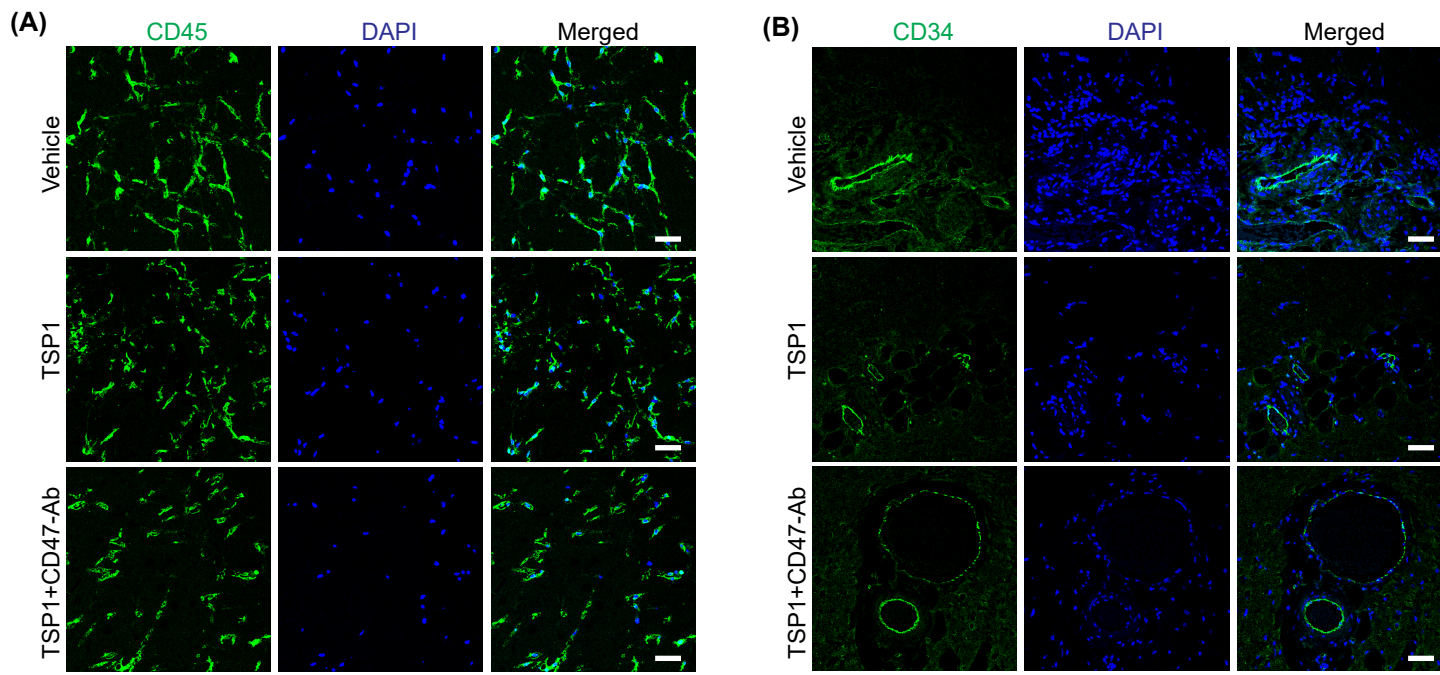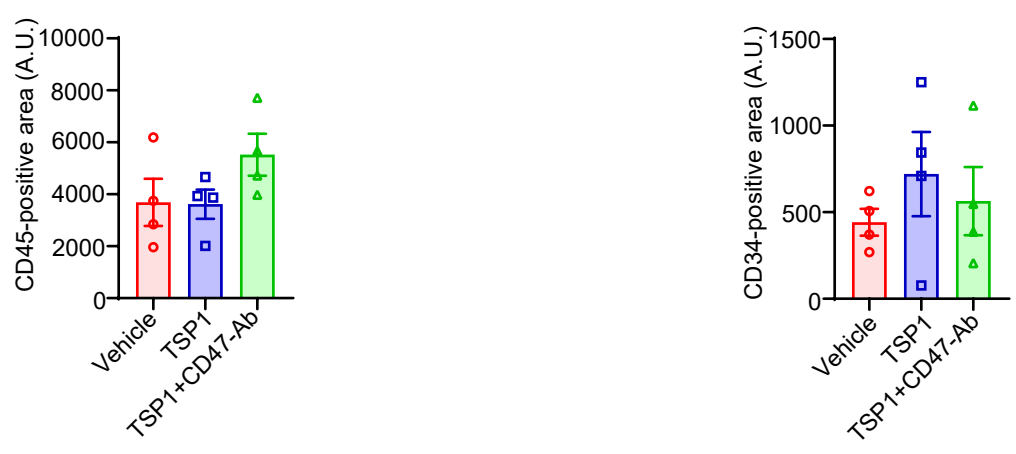

**Figure S4. Immune cell infiltration and angiogenesis in Matrigel plugs.** (A and B) Male wild-type mice were injected s.c. with Matrigel solutions premixed with either VEGF-C (vehicle), VEGF-C+TSP1 (TSP1) or VEGF-C+TSP1+CD47-blocking antibody (TSP1+CD47-Ab). Plugs were isolated after 10 days, sectioned and immunostained for CD45 and CD34 to determine immune cell infiltration and angiogenesis, respectively. Representative images of CD45 (A) and CD34 (B) immunostaining and quantification of CD45/CD34-positive area are shown ( $n = 4$ ). Scale bar 50  $\mu$ m. Statistical analyses were performed using one-way ANOVA with Tukey's multiple comparisons test. Data represent mean  $\pm$  SEM.

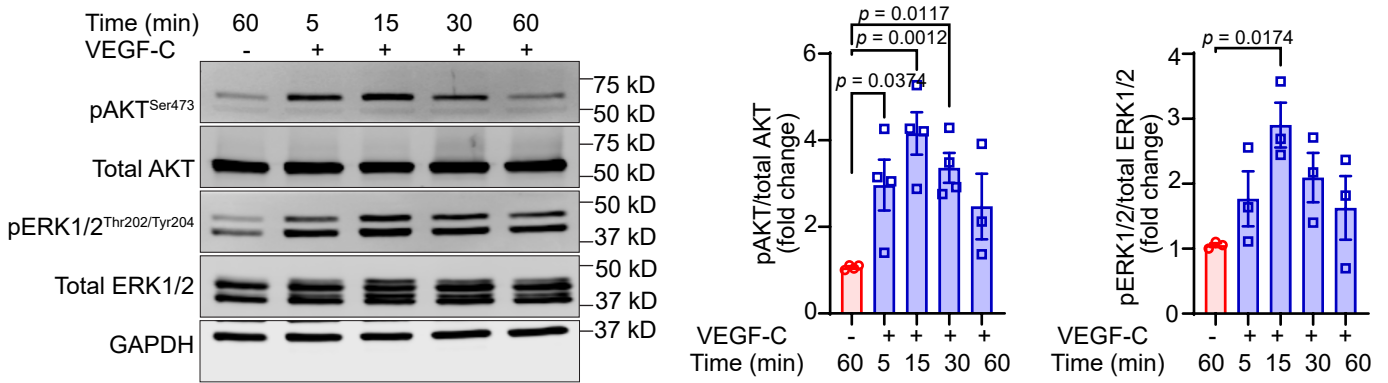

**Figure S5. VEGF-C stimulates maximal activation of AKT and ERK1/2 after 15 min incubation.** LEC were starved overnight in 0.5% FBS containing basal media MV2, treated with VEGF-C (100 ng/mL) for indicated time points, and cell lysates subjected to western blot analysis. Representative western blot images are shown. Bar diagrams represent mean protein levels expressed as a ratio of phospho to total proteins ( $n = 3 - 4$ ). Statistical analyses were performed using one-way ANOVA with Dunnett's multiple comparisons test. Data represent mean  $\pm$  SEM.



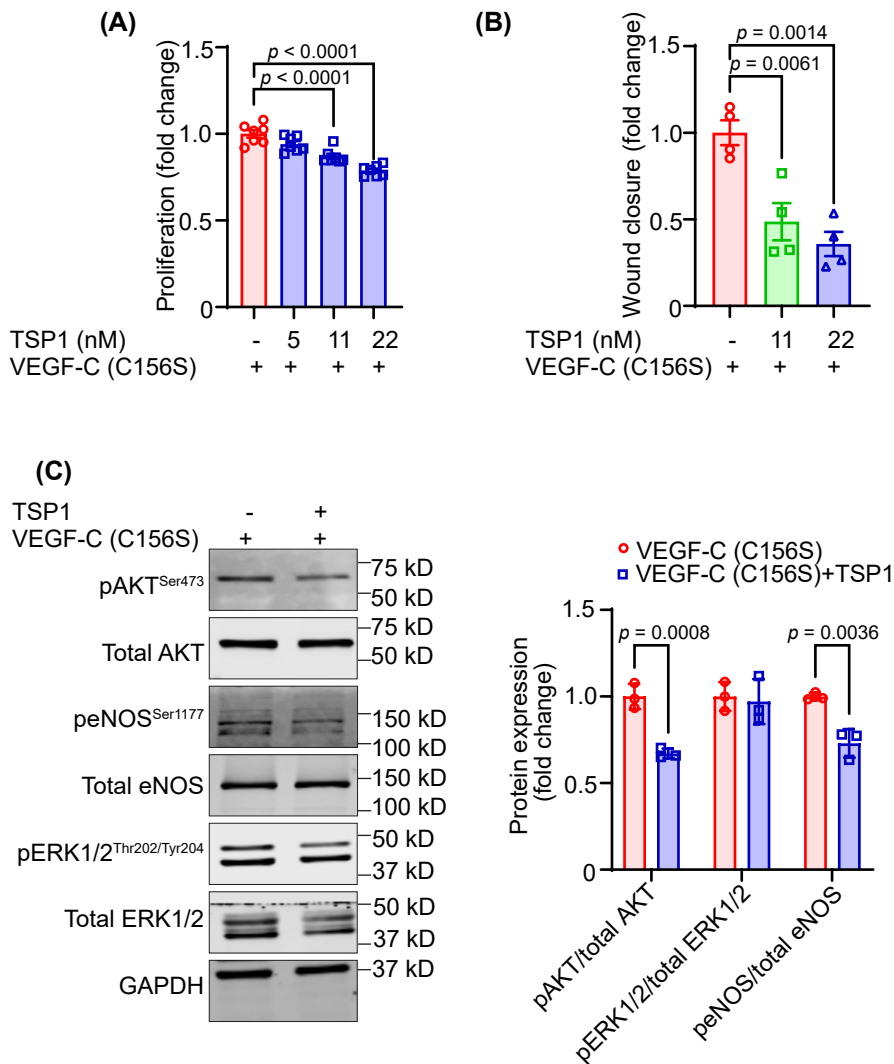

**Figure S6. TSP1 suppresses VEGF-C (C156S)-stimulated lymphangiogenic signaling.** **(A)** Human LEC were treated with vehicle or TSP1 (5, 11 and 22 nM) for 4 h, stimulated with VEGFR3-specific mutant VEGF-C (C156S) (100 ng/mL) for 48 h, and cell proliferation investigated using WST-1 assay ( $n = 7$ ). **(B)** LEC migration in response to TSP1 treatment after 24 h of VEGF-C (C156S) stimulation ( $n = 4$ ). **(C)** LEC were pretreated with TSP1 (22 nM, 16 h) in 0.5% FBS containing basal media MV2, stimulated with VEGF-C (C156S) (15 min), and cell lysates subjected to western blot analysis. Representative western blot images are shown. Bar diagrams represent mean protein levels expressed as a ratio of phospho to total proteins ( $n = 3$ ). Statistical analyses were performed using one-way ANOVA with Dunnett's/Sidak's multiple comparisons test **(A and B)** and two-way ANOVA with Sidak's multiple comparisons test **(C)**. Data represent mean  $\pm$  SEM. Data represent mean  $\pm$  SEM.

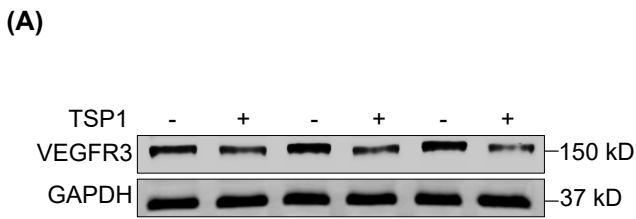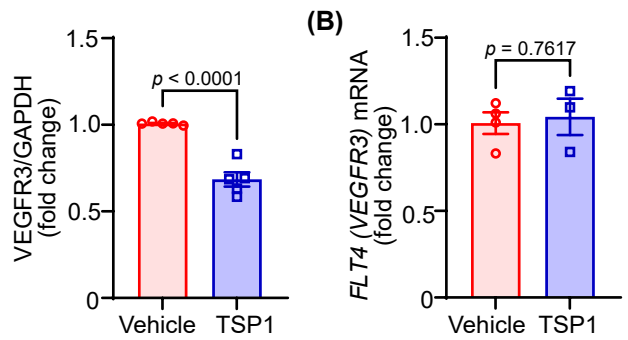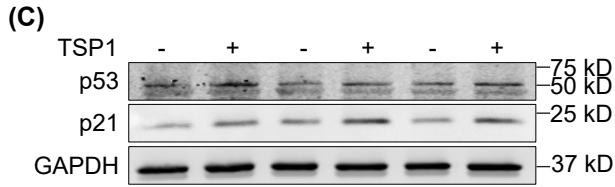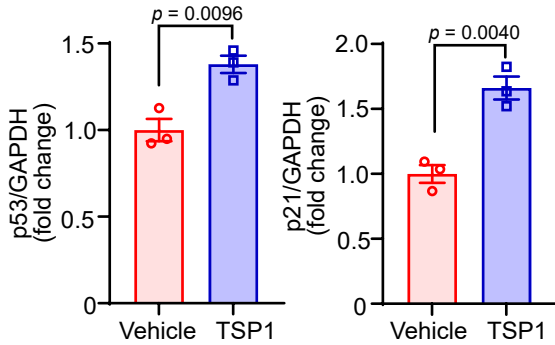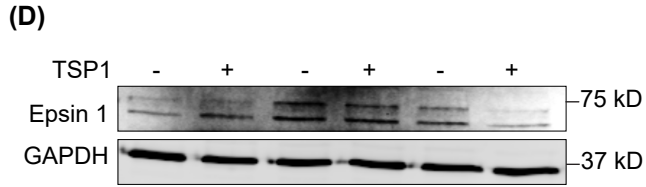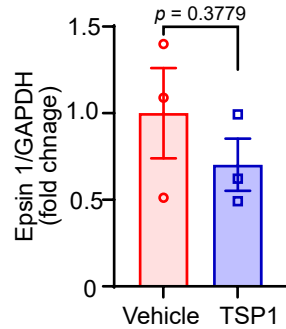

**Figure S7. TSP1 treatment reduces VEGFR3 and induces p21 and p53 protein expression in LEC.** LEC were treated with TSP1 (22 nM, 16 h) in 0.5% FBS containing basal media MV2 and cell lysates subjected to western blot analysis. **(A)** Representative western blot images and VEGFR3 expression normalized with GAPDH ( $n = 5$ ). **(B)** Human LEC were treated with TSP1 (22 nM) for 24 h and qRT-PCR was performed to determine *FLT4* mRNA levels. **(C)** Representative western blot images and p53/p21 expression normalized with GAPDH ( $n = 3$ ). **(D)** Representative western blot images and Epsin 1/GAPDH protein levels ( $n = 3$ ). Statistical analyses were performed using a two-tailed unpaired *t*-test. Data represent mean  $\pm$  SEM.

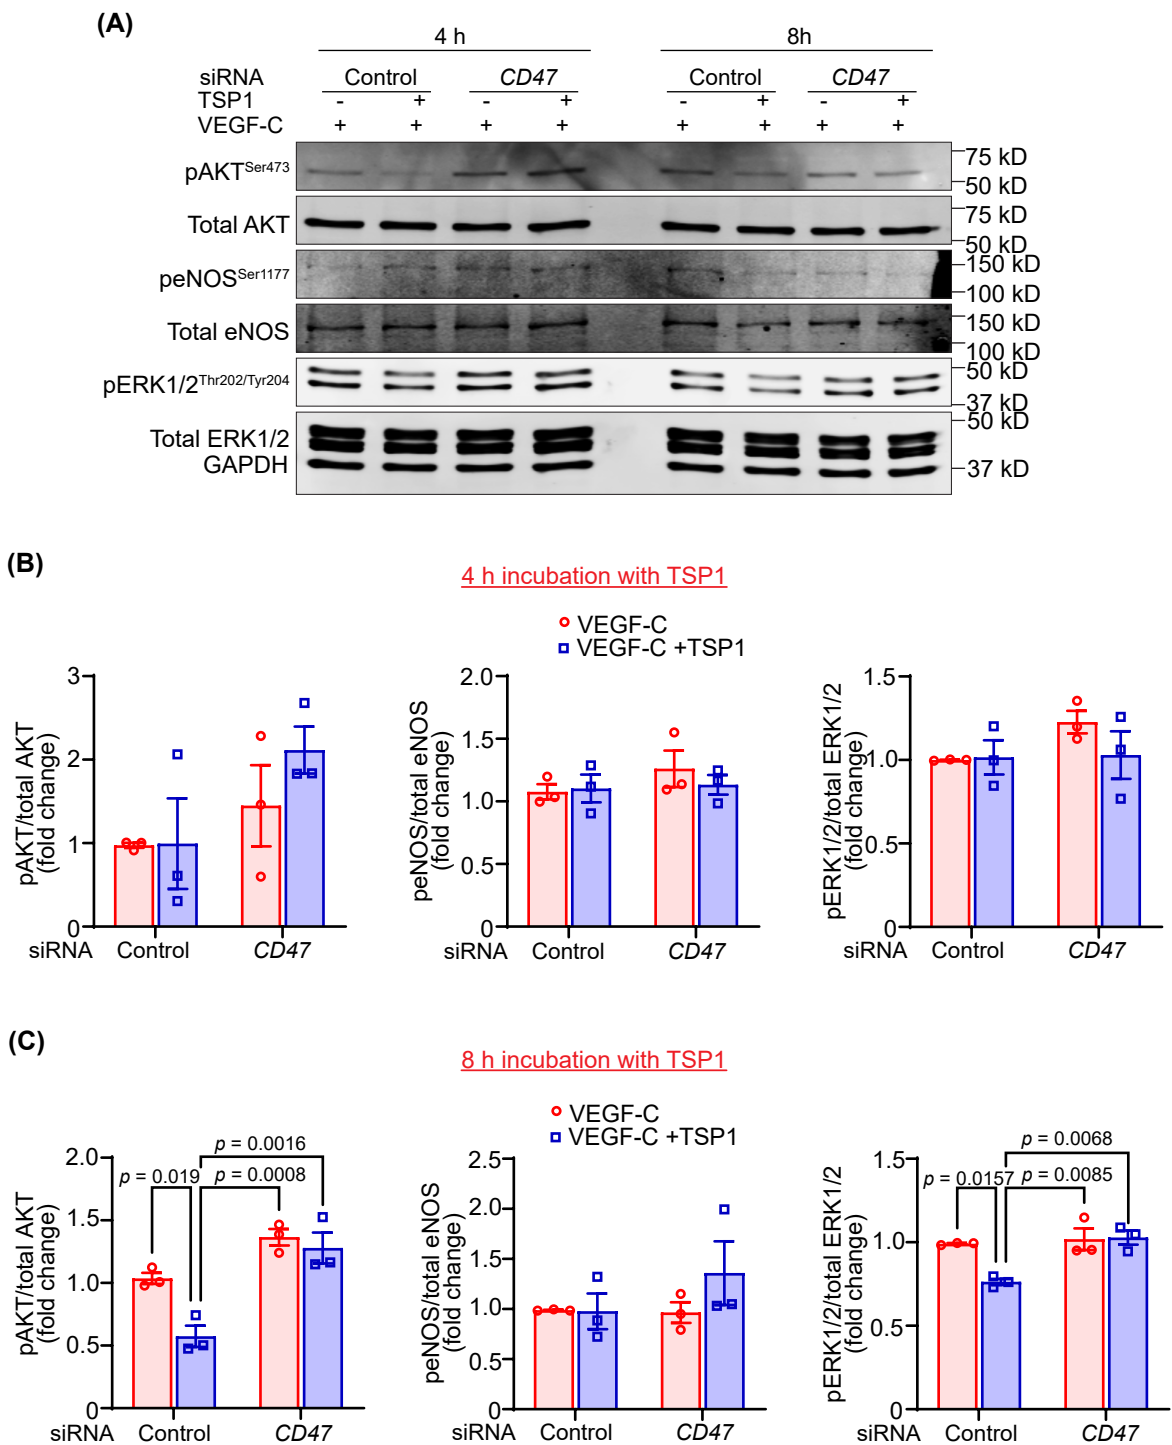

**Figure S8. Effects of TSP1 treatment on VEGF-C-stimulated activation of AKT, eNOS and ERK1/2 at different time points.** (A) Representative western blot images are shown. (B and C) Bar diagrams represent mean protein levels expressed as a ratio of phospho to total proteins ( $n = 3$ ). Statistical analyses were performed using two-way ANOVA with Tukey's multiple comparisons test. Data represent mean  $\pm$  SEM.

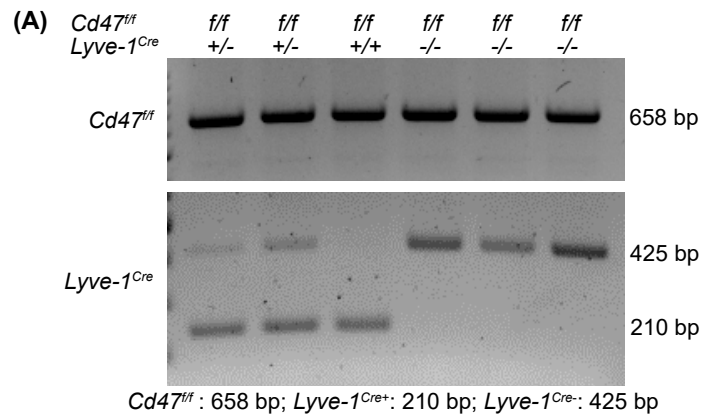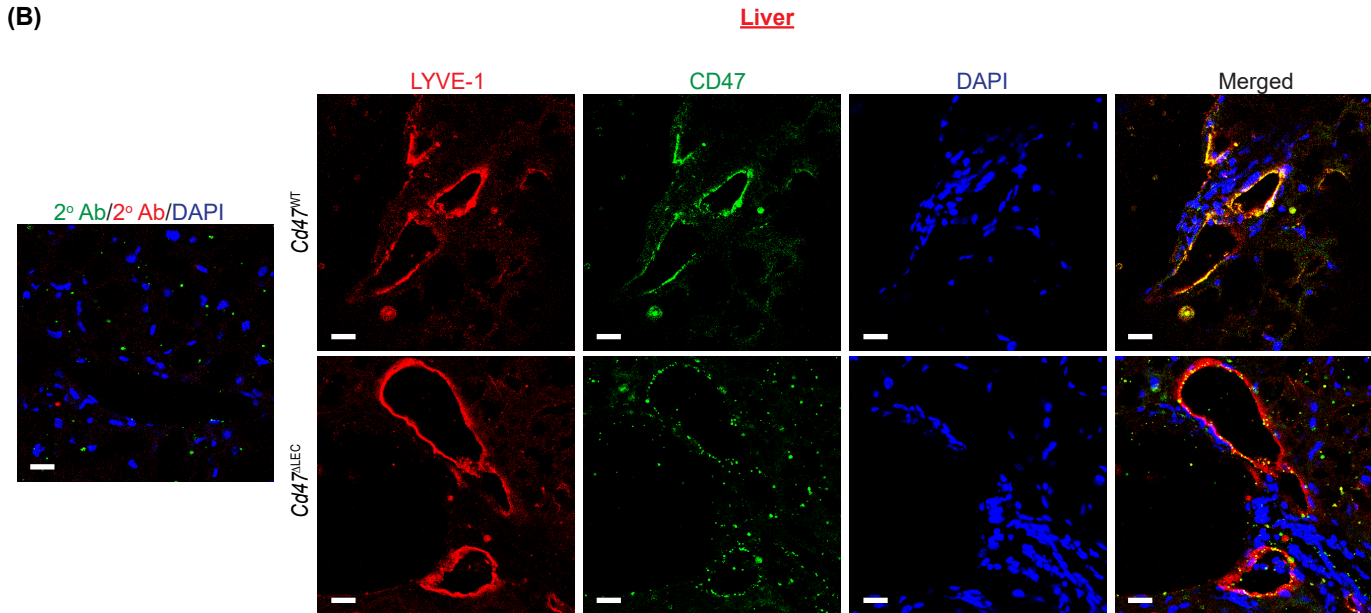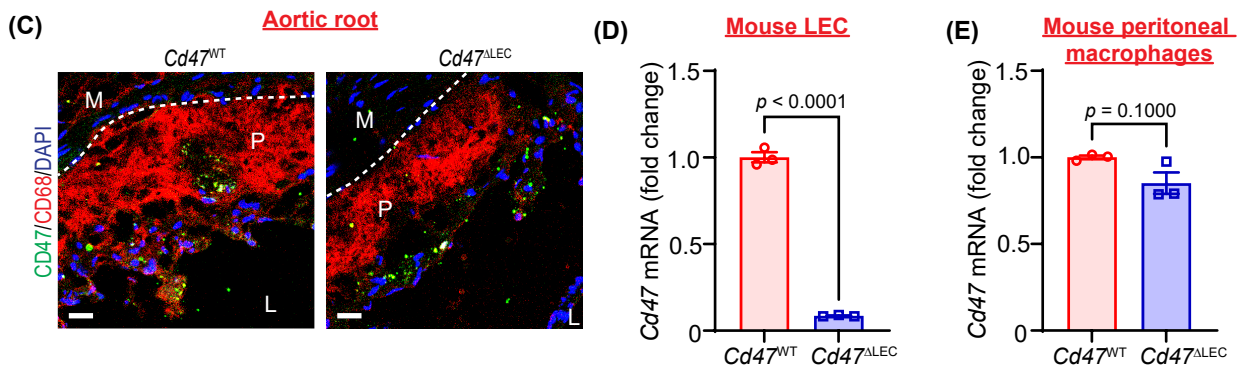

**Figure S9. Confirmation of LEC-specific *Cd47* deletion.** (A) Agarose gel showing representative genotyping experiments for *Cd47* flox and *Lyve-1* Cre. (B) Liver tissue cross-sections from male *Cd47<sup>WT</sup>* and *Cd47<sup>ΔLEC</sup>* mice were immunostained for LYVE-1 (red) and CD47 (green). Nuclei were counterstained with DAPI (blue). Scale bar 20  $\mu$ m. (C) Immunostaining for CD47 (green) and CD68 (macrophage marker, red) using aortic root cross-sections of *Cd47<sup>WT</sup>* and *Cd47<sup>ΔLEC</sup>* mice. Scale bar 20  $\mu$ m. (D & E) *Cd47* mRNA expression in lung LEC and thioglycollate-elicited peritoneal macrophages isolated from male mice. Statistical analyses were performed using two-tailed unpaired *t*-test (D) and Mann-Whitney test (E). Data represent mean  $\pm$  SEM. L: lumen, P: plaque and M: media.

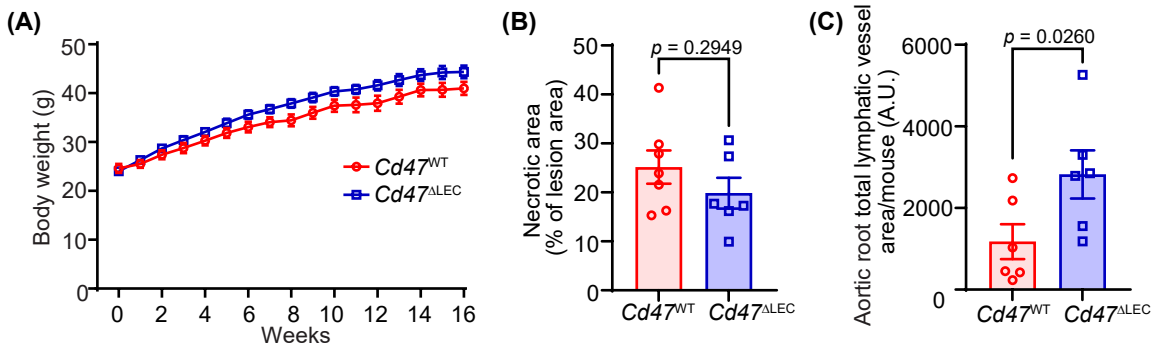

**Figure S10. LEC-specific *Cd47* deletion does not alter weight gain.** Male *Cd47*<sup>WT</sup> and *Cd47*<sup>ΔLEC</sup> mice were injected with AAV8-PCSK9 *i.p.*, fed a Western diet for 16 weeks. **(A)** Diagram shows body weight. **(B)** Aortic root necrotic area ( $n = 6-7$ ). **(C)** Bar graph represents aortic root total LYVE-1-positive area/mouse ( $n = 6$ ). Statistical analyses were performed using a multiple unpaired *t*-test **(A)**, two-tailed unpaired *t*-test **(B)** and two-tailed unpaired Mann-Whitney test **(C)**. Data represent mean  $\pm$  SEM.

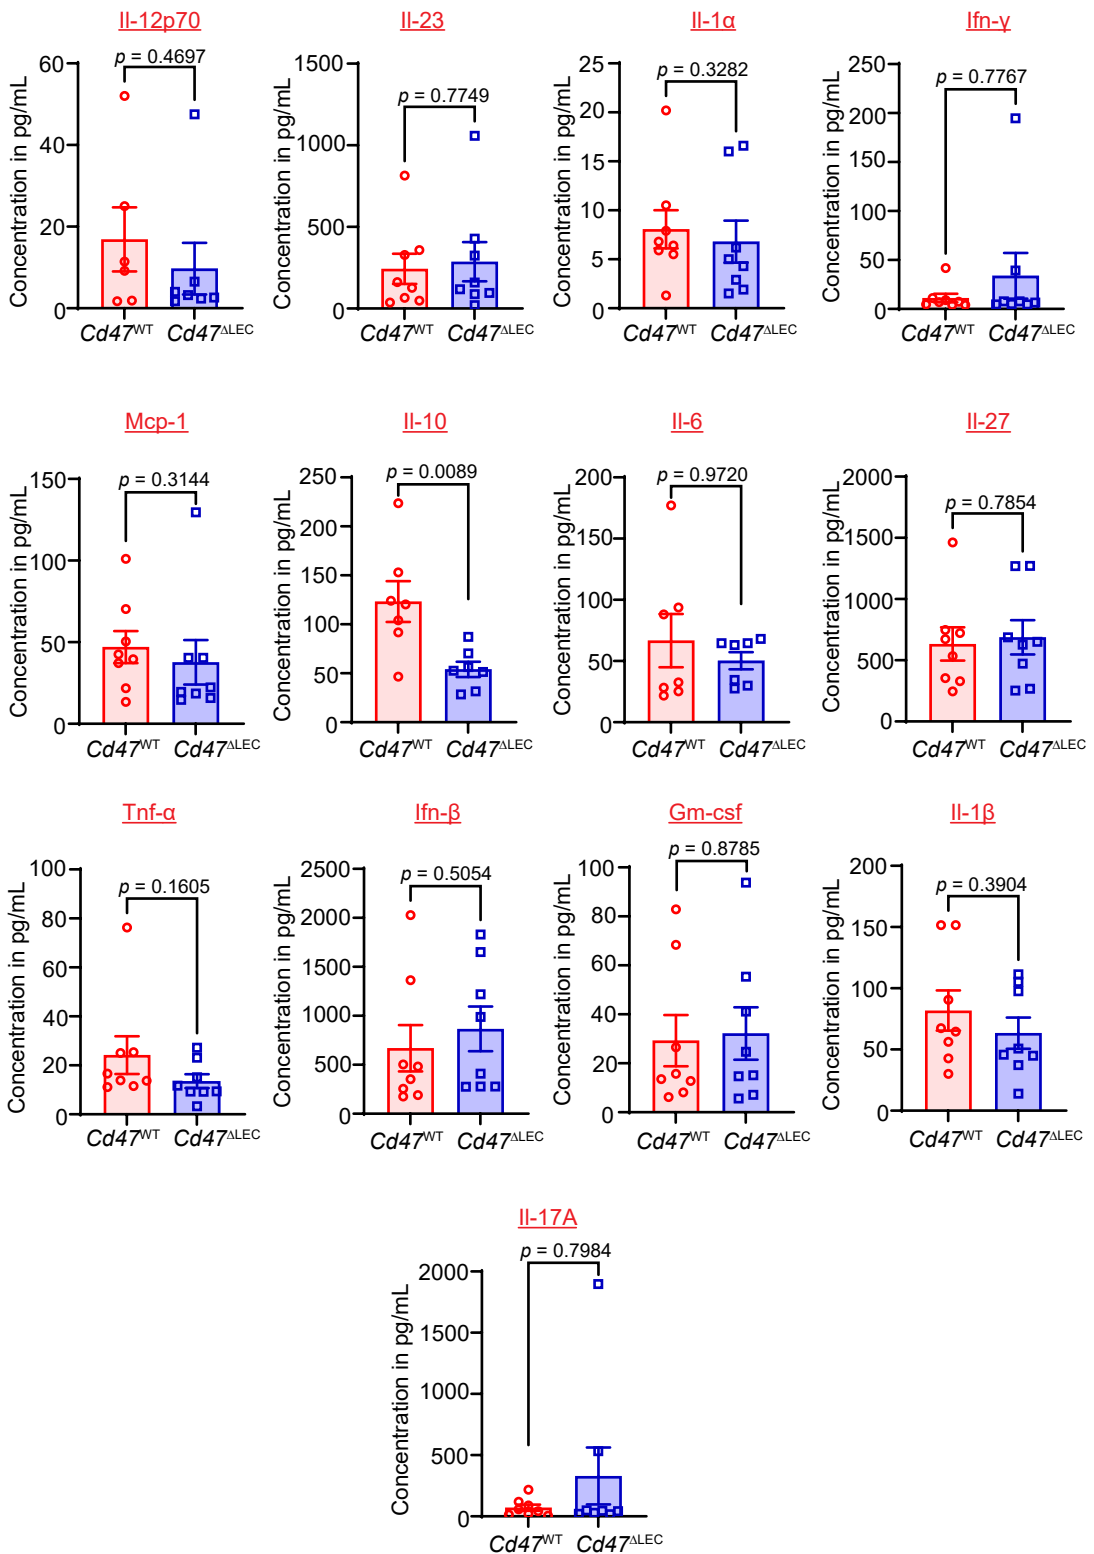

**Figure S11. LEC-specific *Cd47* deletion does not affect plasma cytokine levels.** Male *Cd47*<sup>WT</sup> and *Cd47*<sup>ALEC</sup> mice were injected with AAV8-PCSK9 *i.p.*, fed a Western diet for 16 weeks, and plasma cytokine levels analyzed using a LEGENDplex™ bead-based immunoassay ( $n = 6 - 8$ ). Statistical analyses were performed using non-parametric Mann-Whitney test, except for Il-23, Il-1 $\beta$ , Il-10 and Il-27, which were compared using a two-tailed unpaired *t*-test. Data represent mean  $\pm$  SEM.

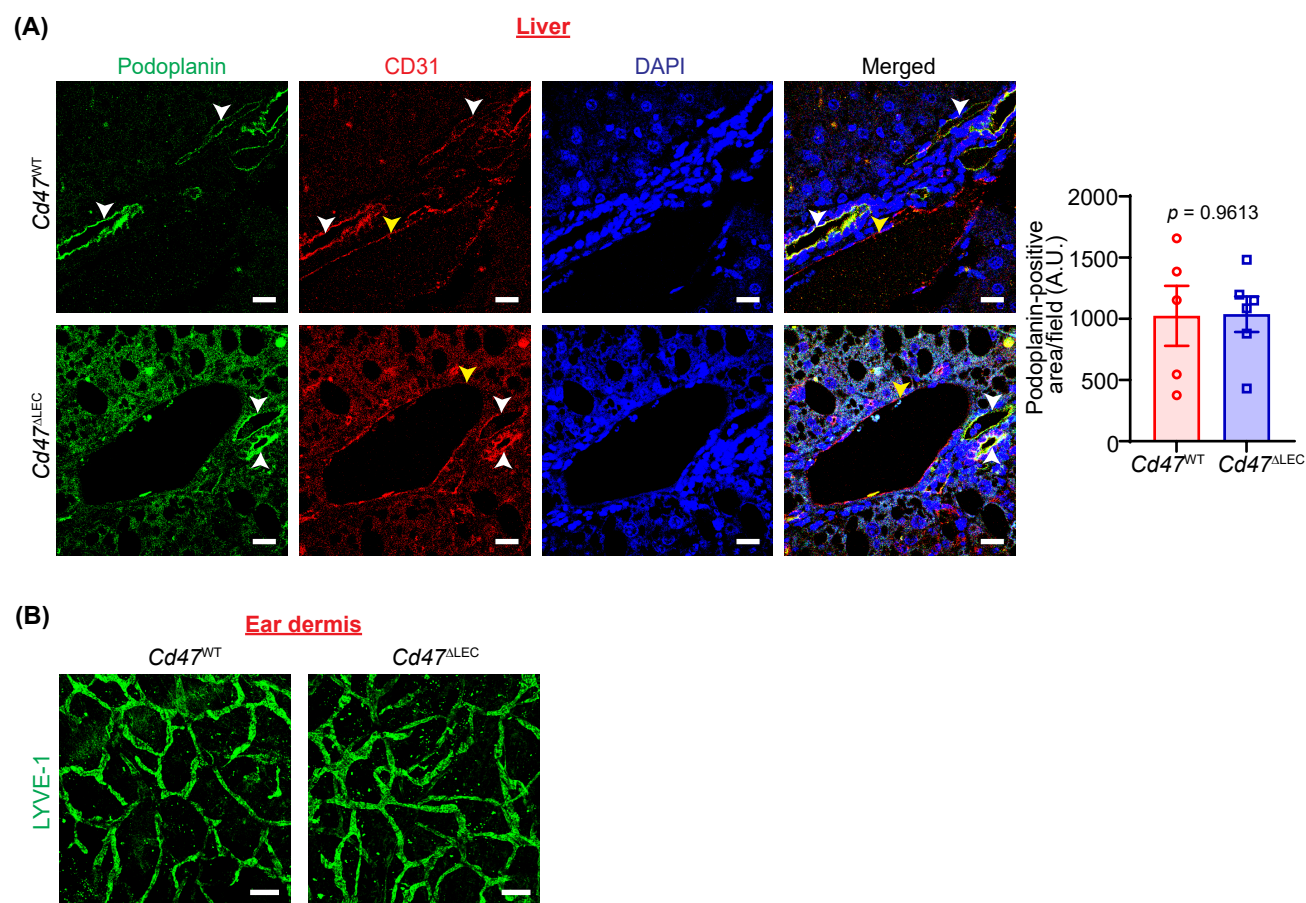

**Figure S12. (A)** Liver sections of male *Cd47<sup>WT</sup>* and *Cd47<sup>ΔLEC</sup>* mice were immunostained for podoplanin (LEC marker, green) and CD31 (endothelial cell marker). Nuclei were counterstained with DAPI (blue). Representative images are shown. Scale bar 20  $\mu\text{m}$ . Bar graphs represent mean podoplanin-positive area/field ( $n = 5$ ). White arrowheads: lymphatic vessels and yellow arrowheads: blood vessels. **(B)** Ear dermal sheets of male *Cd47<sup>WT</sup>* and *Cd47<sup>ΔLEC</sup>* mice were immunostained for LYVE-1 (green). Scale bar 200  $\mu\text{m}$ . Statistical analyses were performed using a two-tailed unpaired *t*-test. Data represent mean  $\pm$  SEM.

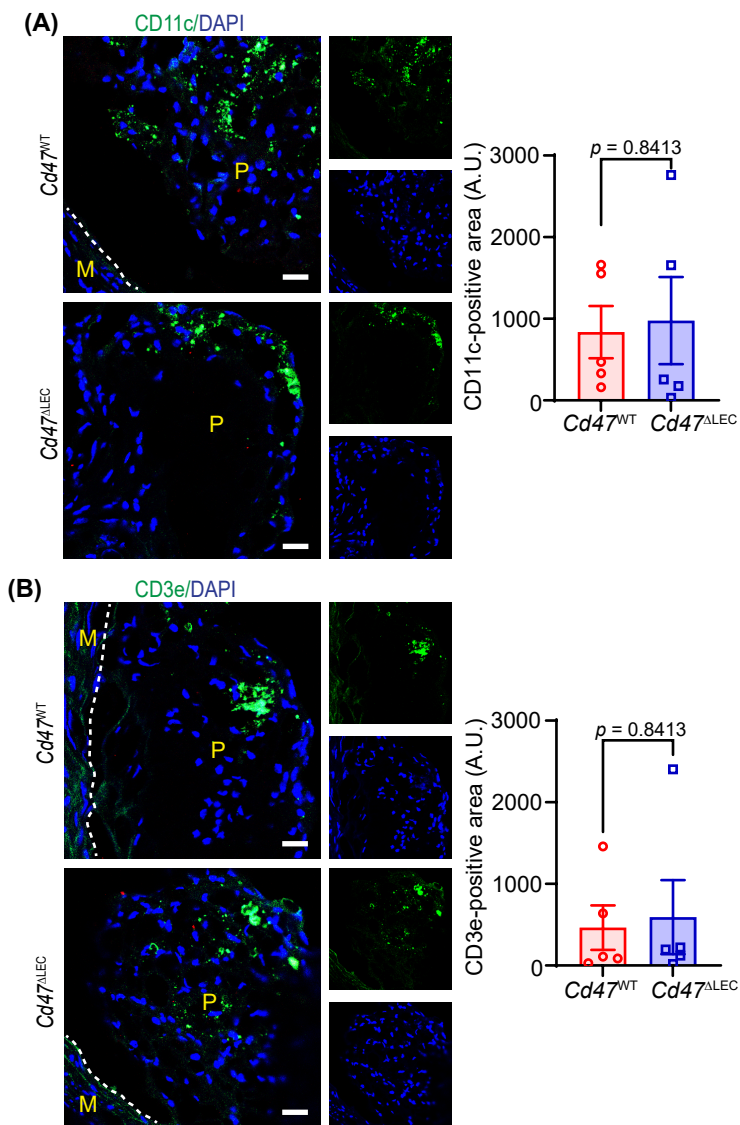

**Figure S13. *Cd47<sup>WT</sup>* and *Cd47<sup>ΔLEC</sup>* mice have similar number of intraplaque dendritic cells and T-cells.** Aortic root cross-sections from male AAV8-PCSK9-injected *Cd47<sup>WT</sup>* and *Cd47<sup>ΔLEC</sup>* mice (16 weeks Western diet) were immunostained for CD11c and CD3e. Nuclei were counterstained with DAPI (blue). Representative images of CD11c (green, **A**) and CD3e (green, **B**) are shown. Scale bar 20 μm. Bar graphs represent CD11c-positive area/mouse and CD3e-positive area/mouse. Images of CD11c- and CD3e-positive areas of entire aortic root section were captured. Statistical analyses were performed using a Mann-Whitney test. Data represent mean ± SEM.



**Table S1: List of primers used for mice genotyping using conventional PCR.**

| <b>Genotyping primer sequences</b>                                                                                                                                     |                                                                         |
|------------------------------------------------------------------------------------------------------------------------------------------------------------------------|-------------------------------------------------------------------------|
| <b><i>ApoE</i> knockout</b>                                                                                                                                            |                                                                         |
| ApoE <sup>F</sup> ; 5'-GCC TAG CCG AGG GAG AGC CG-3'<br>ApoE <sup>RW</sup> ; 5'-TGT GAC TTG GGA GCT CTG CAG C-3'<br>ApoE <sup>RM</sup> ; 5'-GCC GCC CCG ACT GCA TCT-3' | Wild-type: 155 bp<br>Heterozygous: 155 bp<br>& 245 kb<br>Mutant: 245 bp |
| <b><i>Lyve-1 Cre</i></b>                                                                                                                                               |                                                                         |
| 10204; 5'-TGC CAC CTG AAG TCT CTC CT-3'<br>10205; 5'-TGA GCC ACA GAA GGG TTA GG-3'<br>10206; 5'-GAG GAT GGG GAC TGA AAC TG-3'                                          | Mutant: 210 bp<br>Heterozygous: 210 bp<br>& 425 kb<br>Wild-type: 425 bp |
| <b><i>Cd47 floxed</i></b>                                                                                                                                              |                                                                         |
| CSD-Cd47-F; 5'-TCTACACTAAACTCAGCTGGCCTGG-3'<br>CSD-Cd47-ttR; 5'-CTGTCTCTGTGCTCTCTGGCTAAGG-3'                                                                           | f/f: 658 bp<br>f/+ : 658 bp & 445 kb<br>+/+ : 445 bp                    |

**Table S2: List of primers used for mRNA quantitation using quantitative real-time PCR.**

| <b>Gene name</b>          | <b>Primer sequences</b>                                                        |
|---------------------------|--------------------------------------------------------------------------------|
| <b>Human <i>CD36</i></b>  | F 5'-CTT TGG CTT AAT GAG ACT GGG AC-3'<br>R 5'-GCA ACA AAC ATC ACC ACA CCA-3'  |
| <b>Human <i>CD47</i></b>  | F 5'-AGA AGG TGA AAC GAT CAT CGA GC-3'<br>R 5'-CTC ATC CAT ACC ACC GGA TCT-3'  |
| <b>Human <i>FLT4</i></b>  | F 5'- CTG GAC CGA GTT TGT GGA GG-3'<br>R 5'- GTC ACA TAG AAG TAG ATG AGC CG-3' |
| <b>Human <i>GAPDH</i></b> | F 5'- CATGTTTCGTCATGGGTGTGAACCA-3'<br>R 5'- AGTGATGGCATGGACTGTGGTCAT-3'        |
| <b>Mouse <i>Cd47</i></b>  | F 5'- CAC GGC CTT CAA CAC TGA C-3'<br>R 5'- ACA GGA GTA TAG CCA AAA TTG GG-3'  |
| <b>Mouse <i>Gapdh</i></b> | F 5'- AGG TCG GTG TGA ACG GAT TTG-3'<br>R 5'- GGG GTC GTT GAT GGC AAC A-3'     |

## Major Resources Table

### Animals (*In vivo* study)

| Species                                               | Vendor/Source                                          | Background strain | Sex             | Persistent ID/URL                                                                                                                                 |
|-------------------------------------------------------|--------------------------------------------------------|-------------------|-----------------|---------------------------------------------------------------------------------------------------------------------------------------------------|
| Mouse Wild-type                                       | The Jackson Laboratory, stock # 000664                 | C57BL/6J          | Male            | <a href="https://www.jax.org/strain/000664">https://www.jax.org/strain/000664</a>                                                                 |
| Mouse <i>ApoE</i> <sup>-/-</sup>                      | The Jackson Laboratory, stock # 002052                 | C57BL/6J          | Male            | <a href="https://www.jax.org/strain/002052">https://www.jax.org/strain/002052</a>                                                                 |
| Mouse <i>Lyve-1 Cre</i> <sup>+</sup>                  | The Jackson Laboratory, stock # 012601                 | C57BL/6J          | Female and Male | <a href="https://www.jax.org/strain/012601">https://www.jax.org/strain/012601</a>                                                                 |
| Mouse <i>Cd47</i> <sup>tm1a(KOMP)</sup><br><i>Mbp</i> | Mouse Biology Program, University of California, Davis | C57BL/6           | Female and Male | <a href="https://www.mmrrc.org/catalog/locus_detail.php?mgi_id=MGI:4455408">https://www.mmrrc.org/catalog/locus_detail.php?mgi_id=MGI:4455408</a> |

### Antibodies

| Target antigen                   | Vendor/Source             | Cat # | Working conc. | Persistent ID/URL                                                                                                                                                                                                                                                                                                                                                                                                                         |
|----------------------------------|---------------------------|-------|---------------|-------------------------------------------------------------------------------------------------------------------------------------------------------------------------------------------------------------------------------------------------------------------------------------------------------------------------------------------------------------------------------------------------------------------------------------------|
| Total AKT                        | Cell Signaling Technology | 2920S | 1:1000        | <a href="https://www.cellsignal.com/products/primary-antibodies/akt-pan-40d4-mouse-mab/2920?site-search-type=Products&amp;N=4294956287&amp;Ntt=2920s&amp;fromPage=plp&amp;requestid=1356825">https://www.cellsignal.com/products/primary-antibodies/akt-pan-40d4-mouse-mab/2920?site-search-type=Products&amp;N=4294956287&amp;Ntt=2920s&amp;fromPage=plp&amp;requestid=1356825</a>                                                       |
| pAKT <sup>Ser473</sup>           | Cell Signaling Technology | 4060S | 1:1000        | <a href="https://www.cellsignal.com/products/primary-antibodies/phospho-akt-ser473-d9e-xp-rabbit-mab/4060?site-search-type=Products&amp;N=4294956287&amp;Ntt=4060s&amp;fromPage=plp&amp;requestid=1356896">https://www.cellsignal.com/products/primary-antibodies/phospho-akt-ser473-d9e-xp-rabbit-mab/4060?site-search-type=Products&amp;N=4294956287&amp;Ntt=4060s&amp;fromPage=plp&amp;requestid=1356896</a>                           |
| peNOS <sup>Ser117</sup>          | Cell Signaling Technology | 9571S | 1:1000        | <a href="https://www.cellsignal.com/products/primary-antibodies/phospho-enos-ser1177-antibody/9571?site-search-type=Products&amp;N=4294956287&amp;Ntt=9571s&amp;fromPage=plp&amp;requestid=1356946">https://www.cellsignal.com/products/primary-antibodies/phospho-enos-ser1177-antibody/9571?site-search-type=Products&amp;N=4294956287&amp;Ntt=9571s&amp;fromPage=plp&amp;requestid=1356946</a>                                         |
| Total eNOS                       | Cell Signaling Technology | 5880S | 1:1000        | <a href="https://www.cellsignal.com/products/primary-antibodies/enos-6h2-mouse-mab/5880?site-search-type=Products&amp;N=4294956287&amp;Ntt=5880s&amp;fromPage=plp&amp;requestid=1357026">https://www.cellsignal.com/products/primary-antibodies/enos-6h2-mouse-mab/5880?site-search-type=Products&amp;N=4294956287&amp;Ntt=5880s&amp;fromPage=plp&amp;requestid=1357026</a>                                                               |
| pERK1/2 <sup>Thr202/Tyr204</sup> | Cell Signaling Technology | 9101S | 1:1000        | <a href="https://www.cellsignal.com/products/primary-antibodies/phospho-p44-42-mapk-erk1-2-thr202-tyr204-antibody/9101?site-search-type=Products&amp;N=4294956287&amp;Ntt=9101s&amp;fromPage=plp&amp;requestid=1357077">https://www.cellsignal.com/products/primary-antibodies/phospho-p44-42-mapk-erk1-2-thr202-tyr204-antibody/9101?site-search-type=Products&amp;N=4294956287&amp;Ntt=9101s&amp;fromPage=plp&amp;requestid=1357077</a> |
| Total ERK1/2                     | Cell Signaling Technology | 4695S | 1:1000        | <a href="https://www.cellsignal.com/products/primary-antibodies/p44-42-mapk-erk1-2-137f5-">https://www.cellsignal.com/products/primary-antibodies/p44-42-mapk-erk1-2-137f5-</a>                                                                                                                                                                                                                                                           |

|                                       |                           |                                                  |                     |                                                                                                                                                                                                                                                                                                 |
|---------------------------------------|---------------------------|--------------------------------------------------|---------------------|-------------------------------------------------------------------------------------------------------------------------------------------------------------------------------------------------------------------------------------------------------------------------------------------------|
|                                       |                           |                                                  |                     | <a href="https://www.abcam.com/products/primary-antibodies/rabbit-mab/4695?site-search-type=Products&amp;N=4294956287&amp;Ntt=4695s&amp;fromPage=plp&amp;requestid=1357131">rabbit-mab/4695?site-search-type=Products&amp;N=4294956287&amp;Ntt=4695s&amp;fromPage=plp&amp;requestid=1357131</a> |
| p21                                   | Cell Signaling Technology | 2947                                             | 1:1000              | <a href="https://www.cellsignal.com/products/primary-antibodies/p21-waf1-cip1-12d1-rabbit-mab/2947">https://www.cellsignal.com/products/primary-antibodies/p21-waf1-cip1-12d1-rabbit-mab/2947</a>                                                                                               |
| CD47                                  | Novus Biologicals, LLC    | NBP2-31106                                       | 1:500               | <a href="https://www.novusbio.com/products/cd47-antibody-b6h122_nbp2-31106">https://www.novusbio.com/products/cd47-antibody-b6h122_nbp2-31106</a>                                                                                                                                               |
| CD47                                  | Abcam                     | ab175388                                         | 1:500               | <a href="https://www.abcam.com/products/primary-antibodies/cd47-antibody-ab175388.html">https://www.abcam.com/products/primary-antibodies/cd47-antibody-ab175388.html</a>                                                                                                                       |
| VEGFR3                                | Santa Cruz Biotechnology  | sc-321                                           | 1:500               | <a href="https://www.scbt.com/p/flt-4-antibody-c-20">https://www.scbt.com/p/flt-4-antibody-c-20</a>                                                                                                                                                                                             |
| Epsin 1                               | Santa Cruz Biotechnology  | sc-55556                                         | 1:500               | <a href="https://www.scbt.com/p/epsin-1-antibody-c-11?requestFrom=search">https://www.scbt.com/p/epsin-1-antibody-c-11?requestFrom=search</a>                                                                                                                                                   |
| p53                                   | Santa Cruz Biotechnology  | sc-126                                           | 1:1000              | <a href="https://www.scbt.com/p/p53-antibody-do-1?requestFrom=search">https://www.scbt.com/p/p53-antibody-do-1?requestFrom=search</a>                                                                                                                                                           |
| GAPDH                                 | Santa Cruz Biotechnology  | sc-365062                                        | 1:2000              | <a href="https://www.scbt.com/p/gapdh-antibody-g-9?requestFrom=search">https://www.scbt.com/p/gapdh-antibody-g-9?requestFrom=search</a>                                                                                                                                                         |
| TSP1                                  | Proteintech               | 18304-1-AP                                       | 1:400<br>(1:80 IHC) | <a href="https://www.ptglab.com/products/TSP1-Antibody-18304-1-AP.htm">https://www.ptglab.com/products/TSP1-Antibody-18304-1-AP.htm</a>                                                                                                                                                         |
| Vinculin 1                            | Sigma-Aldrich             | V4505                                            | 1:1000              | <a href="https://www.sigmaaldrich.com/US/en/product/sigma/v4505">https://www.sigmaaldrich.com/US/en/product/sigma/v4505</a>                                                                                                                                                                     |
| IRDye-conjugated secondary antibodies | Li-Cor Biosciences        | 925-68070<br>925-32211<br>926-32210<br>926-68071 | 1:10000             | <a href="https://www.licor.com/bio/reagents/irdye-secondary-antibodies">https://www.licor.com/bio/reagents/irdye-secondary-antibodies</a>                                                                                                                                                       |
| SMA                                   | Abcam                     | ab7817                                           | 1:100               | <a href="https://www.abcam.com/products/primary-antibodies/alpha-smooth-muscle-actin-antibody-1a4-ab7817.html">https://www.abcam.com/products/primary-antibodies/alpha-smooth-muscle-actin-antibody-1a4-ab7817.html</a>                                                                         |
| CD68                                  | Thermo Fisher Scientific  | MA5-13324                                        | 1:100               | <a href="https://www.thermofisher.com/antibody/product/CD68-Antibody-clone-KP1-Monoclonal/MA5-13324">https://www.thermofisher.com/antibody/product/CD68-Antibody-clone-KP1-Monoclonal/MA5-13324</a>                                                                                             |
| LYVE-1                                | Abcam                     | ab14917                                          | 1:100               | <a href="https://www.abcam.com/products/primary-antibodies/lyve1-antibody-bsa-and-azide-free-ab14917.html">https://www.abcam.com/products/primary-antibodies/lyve1-antibody-bsa-and-azide-free-ab14917.html</a>                                                                                 |
| CD11c                                 | Thermo Fisher Scientific  | 53-0114-80                                       | 1:80                | <a href="https://www.thermofisher.com/antibody/product/CD11c-Antibody-clone-N418-Monoclonal/53-0114-82">https://www.thermofisher.com/antibody/product/CD11c-Antibody-clone-N418-Monoclonal/53-0114-82</a>                                                                                       |
| CD3e                                  | Thermo Fisher Scientific  | 53-0031-80                                       | 1:80                | <a href="https://www.thermofisher.com/antibody/product/CD3e-Antibody-clone-145-2C11-Monoclonal/53-0031-82">https://www.thermofisher.com/antibody/product/CD3e-Antibody-clone-145-2C11-Monoclonal/53-0031-82</a>                                                                                 |
| CD45                                  | Cell Signaling Technology | 70257S                                           | 1:70                | <a href="https://www.cellsignal.com/products/primary-antibodies/cd45-d3f8q-rabbit-mab/70257?site-search-">https://www.cellsignal.com/products/primary-antibodies/cd45-d3f8q-rabbit-mab/70257?site-search-</a>                                                                                   |

|                        |                           |         |           |                                                                                                                                                                                          |
|------------------------|---------------------------|---------|-----------|------------------------------------------------------------------------------------------------------------------------------------------------------------------------------------------|
|                        |                           |         |           | <a href="https://www.abcam.com/products/primary-antibodies/cd34-antibody-ep373y-ab81289.html">type=Products&amp;N=4294956287&amp;Ntt=70257s+&amp;fromPage=plp&amp; requestid=1362172</a> |
| CD34                   | Abcam                     | ab81289 | 1:70      | <a href="https://www.abcam.com/products/primary-antibodies/cd34-antibody-ep373y-ab81289.html">https://www.abcam.com/products/primary-antibodies/cd34-antibody-ep373y-ab81289.html</a>    |
| iNOS                   | Abcam                     | ab3523  | 1:100     | <a href="https://www.abcam.com/products/primary-antibodies/inos-antibody-ab3523.html">https://www.abcam.com/products/primary-antibodies/inos-antibody-ab3523.html</a>                    |
| Arg1                   | Sigma-Aldrich             | AV45673 | 1:100     | <a href="https://www.sigmaaldrich.com/US/en/product/sigma/av45673">https://www.sigmaaldrich.com/US/en/product/sigma/av45673</a>                                                          |
| Podoplanin             | R & D Systems             | AF3244  | 1:40      | <a href="https://www.rndsystems.com/products/mouse-podoplanin-antibody_af3244">https://www.rndsystems.com/products/mouse-podoplanin-antibody_af3244</a>                                  |
| CD31                   | Abcam                     | ab28364 | 1:70      | <a href="https://www.abcam.com/products/primary-antibodies/cd31-antibody-ab28364.html">https://www.abcam.com/products/primary-antibodies/cd31-antibody-ab28364.html</a>                  |
| Ki67                   | Cell Signaling Technology | 9129    | 1:100     | <a href="https://www.cellsignal.com/products/primary-antibodies/ki-67-d3b5-rabbit-mab/9129">https://www.cellsignal.com/products/primary-antibodies/ki-67-d3b5-rabbit-mab/9129</a>        |
| IgG control antibody   | BioXcell                  | BE0083  | 100 µg/mL | <a href="https://bioxcell.com/invivomab-mouse-igg1-isotype-control-unknown-specificity-be0083">https://bioxcell.com/invivomab-mouse-igg1-isotype-control-unknown-specificity-be0083</a>  |
| CD47 blocking antibody | BioXcell                  | BE0283  | 100 µg/mL | <a href="https://bioxcell.com/invivomab-anti-mouse-human-rat-cd47-iap-be0283">https://bioxcell.com/invivomab-anti-mouse-human-rat-cd47-iap-be0283</a>                                    |

## Cultured Cells

| Name                                     | Vendor/Source | Cat #   | Persistent ID/URL                                                                                                                                                         |
|------------------------------------------|---------------|---------|---------------------------------------------------------------------------------------------------------------------------------------------------------------------------|
| Human Dermal Lymphatic Endothelial Cells | PromoCell     | C-12217 | <a href="https://promocell.com/product/human-dermal-lymphatic-endothelial-cells-hdlec/">https://promocell.com/product/human-dermal-lymphatic-endothelial-cells-hdlec/</a> |
| Human aortic endothelial cells           | PromoCell     | C-12271 | <a href="https://promocell.com/product/human-aortic-endothelial-cells-haoec/">https://promocell.com/product/human-aortic-endothelial-cells-haoec/</a>                     |

## Others

| Name                                 | Vendor/Source            | Cat #      | Persistent ID/URL                                                                                                                                                                       |
|--------------------------------------|--------------------------|------------|-----------------------------------------------------------------------------------------------------------------------------------------------------------------------------------------|
| Western diet                         | Envigo                   | TD.88137   | <a href="https://insights.envigo.com/hubfs/resources/data-sheets/88137.pdf">https://insights.envigo.com/hubfs/resources/data-sheets/88137.pdf</a>                                       |
| Blood glucose monitor                | ReliOn                   |            | <a href="https://www.walmart.com/ip/ReliOn-PRIME-Blood-Glucose-Monitoring-System-Red/20752267">https://www.walmart.com/ip/ReliOn-PRIME-Blood-Glucose-Monitoring-System-Red/20752267</a> |
| 4% paraformaldehyde                  | Thermo Fisher Scientific | J19943.K2  | <a href="https://www.thermofisher.com/order/catalog/product/J19943.K2">https://www.thermofisher.com/order/catalog/product/J19943.K2</a>                                                 |
| Optimum cutting temperature compound | Fisher Healthcare        | 23-730-571 | <a href="https://www.fishersci.com/shop/products/tissue-plus-o-c-t-compound/23730571">https://www.fishersci.com/shop/products/tissue-plus-o-c-t-compound/23730571</a>                   |
| Amplex Red cholesterol assay         | Molecular Probes         | A12216     | <a href="https://www.thermofisher.com/order/catalog/product/A12216?SID=srch-srp-A12216">https://www.thermofisher.com/order/catalog/product/A12216?SID=srch-srp-A12216</a>               |
| pAAV-PCSK9-hD374Y                    | Vigene Biosciences       | NA         | NA                                                                                                                                                                                      |
| Plasma triglyceride kit              | Wako Chemicals           | 992-02892  | <a href="https://us.vwr.com/store/product/18367215/l-type-triglyceride-m-assay-wako">https://us.vwr.com/store/product/18367215/l-type-triglyceride-m-assay-wako</a>                     |

|                                                             |                          |                        |                                                                                                                                                                                                                                                                                                                                 |
|-------------------------------------------------------------|--------------------------|------------------------|---------------------------------------------------------------------------------------------------------------------------------------------------------------------------------------------------------------------------------------------------------------------------------------------------------------------------------|
|                                                             |                          | 998-02992<br>464-01601 |                                                                                                                                                                                                                                                                                                                                 |
| Oil Red O                                                   | Sigma-Aldrich            | O0625                  | <a href="https://www.sigmaaldrich.com/US/en/product/sial/o0625">https://www.sigmaaldrich.com/US/en/product/sial/o0625</a>                                                                                                                                                                                                       |
| Endothelial cell growth medium                              | PromoCell                | C-22121                | <a href="https://promocell.com/product/endothelial-cell-growth-medium-mv-2/">https://promocell.com/product/endothelial-cell-growth-medium-mv-2/</a>                                                                                                                                                                             |
| Human <i>CD47</i> siRNA                                     | Horizon Discovery        | M-019505-01-0005       | <a href="https://horizondiscovery.com/en/gene-modulation/knockdown/sirna/products/signome-sirna-reagents?nodeid=entrezgene-961&amp;catalognumber=M-019505-01-0005">https://horizondiscovery.com/en/gene-modulation/knockdown/sirna/products/signome-sirna-reagents?nodeid=entrezgene-961&amp;catalognumber=M-019505-01-0005</a> |
| Control siRNA                                               | Horizon Discovery        | D-001210-01-05         | <a href="https://horizondiscovery.com/en/gene-modulation/knockdown/controls/products/signome-non-targeting-control-sirnas?catalognumber=D-001210-01-05">https://horizondiscovery.com/en/gene-modulation/knockdown/controls/products/signome-non-targeting-control-sirnas?catalognumber=D-001210-01-05</a>                       |
| TransIT-TKO transfection reagent                            | Mirus Bio LLC            | MIR 2155               | <a href="https://www.mirusbio.com/products/transfection/transit-tko-transfection-reagent#product:MIR%202155">https://www.mirusbio.com/products/transfection/transit-tko-transfection-reagent#product:MIR%202155</a>                                                                                                             |
| Nitrocellulose membranes                                    | Li-Cor Biosciences       | 926-31092              | <a href="https://www.licor.com/bio/reagents/odyssey-nitrocellulose-membranes">https://www.licor.com/bio/reagents/odyssey-nitrocellulose-membranes</a>                                                                                                                                                                           |
| Fluoromount-G Mounting Medium, with DAPI                    | Thermo Fisher Scientific | 00-4959-52             | <a href="https://www.thermofisher.com/order/catalog/product/00-4959-52">https://www.thermofisher.com/order/catalog/product/00-4959-52</a>                                                                                                                                                                                       |
| Hematoxylin                                                 | Fisher Healthcare        | 22-220-100             | <a href="https://www.fishersci.com/shop/products/fisher-healthcare-pinnacle-portfolio-hematoxylin-stain-1/22220100">https://www.fishersci.com/shop/products/fisher-healthcare-pinnacle-portfolio-hematoxylin-stain-1/22220100</a>                                                                                               |
| Eosin                                                       | Fisher Healthcare        | 22-220-104             | <a href="https://www.fishersci.com/shop/products/fisher-healthcare-pinnacle-portfolio-eosin-y-stain/22220104#?keyword=22-220-104">https://www.fishersci.com/shop/products/fisher-healthcare-pinnacle-portfolio-eosin-y-stain/22220104#?keyword=22-220-104</a>                                                                   |
| Epredia UltraVision LP HRP polymer and DAB Detection System | Richard Allan Scientific | TL015HD                | <a href="https://www.fishersci.com/shop/products/ultravision-lp-hrp-polymer-dab-detection-system/TL015HD">https://www.fishersci.com/shop/products/ultravision-lp-hrp-polymer-dab-detection-system/TL015HD</a>                                                                                                                   |
| Cell Proliferation Reagent WST-1                            | Roche Diagnostics        | 5015944001             | <a href="https://www.sigmaaldrich.com/US/en/product/roche/cellpro">https://www.sigmaaldrich.com/US/en/product/roche/cellpro</a>                                                                                                                                                                                                 |
| Human recombinant TSP1                                      | Sigma-Aldrich            | ECM002                 | <a href="https://www.sigmaaldrich.com/US/en/product/sigma/ecm002">https://www.sigmaaldrich.com/US/en/product/sigma/ecm002</a>                                                                                                                                                                                                   |
| Human recombinant VEGF-C                                    | Peprtech                 | 100-20CD               | <a href="https://www.peprtech.com/en/recombinant-human-vegf-c-2">https://www.peprtech.com/en/recombinant-human-vegf-c-2</a>                                                                                                                                                                                                     |
| FxCycle™ PI/RNase Staining Solution                         | Thermo Fisher Scientific | F10797                 | <a href="https://www.thermofisher.com/order/catalog/product/F10797">https://www.thermofisher.com/order/catalog/product/F10797</a>                                                                                                                                                                                               |
| IBI Tri-Isolate RNA Pure Kit                                | IBI Scientific           | IB47632                | <a href="https://www.ibisci.com/products/tri-isolate-rna-pure-kit?variant=31245650526319">https://www.ibisci.com/products/tri-isolate-rna-pure-kit?variant=31245650526319</a>                                                                                                                                                   |
| Fast SYBR™ Green Master Mix                                 | Applied Biosystems       | 4385612                | <a href="https://www.thermofisher.com/order/catalog/product/4385612">https://www.thermofisher.com/order/catalog/product/4385612</a>                                                                                                                                                                                             |

|                                     |                          |        |                                                                                                                                                                                                                                                                                                                                                                                                                                                                                                                                                         |
|-------------------------------------|--------------------------|--------|---------------------------------------------------------------------------------------------------------------------------------------------------------------------------------------------------------------------------------------------------------------------------------------------------------------------------------------------------------------------------------------------------------------------------------------------------------------------------------------------------------------------------------------------------------|
| 2',7'-Dichlorofluorescein diacetate | Sigma-Aldrich            | D6883  | <a href="https://www.sigmaaldrich.com/US/en/product/sigma/d6883">https://www.sigmaaldrich.com/US/en/product/sigma/d6883</a>                                                                                                                                                                                                                                                                                                                                                                                                                             |
| DAF-FM diacetate solution           | Thermo Fisher Scientific | D23844 | <a href="https://www.thermofisher.com/order/catalog/product/D23844#:~:text=Invitrogen%E2%84%A2-.DAF%2DFM%20Diacetate%20(4%2DAmino%2D5%2DMethylamino,%2C7'%2DDifluorofluorescein%20Diacetate)&amp;text=DAF%2DFM%20is%20a%20reagent,to%20form%20a%20fluorescent%20benzotriazole">https://www.thermofisher.com/order/catalog/product/D23844#:~:text=Invitrogen%E2%84%A2-.DAF%2DFM%20Diacetate%20(4%2DAmino%2D5%2DMethylamino,%2C7'%2DDifluorofluorescein%20Diacetate)&amp;text=DAF%2DFM%20is%20a%20reagent,to%20form%20a%20fluorescent%20benzotriazole</a> |
| LEGENDplex™ bead-based immunoassay  | BioLegend                | 740150 | <a href="https://www.biolegend.com/en-us/products/legendplex-mouse-inflammation-panel-13-plex-with-filter-plate-10703">https://www.biolegend.com/en-us/products/legendplex-mouse-inflammation-panel-13-plex-with-filter-plate-10703</a>                                                                                                                                                                                                                                                                                                                 |

## ARRIVE GUIDELINES

The ARRIVE guidelines (<https://arriveguidelines.org/>) are a checklist of recommendations to improve the reporting of research involving animals. Key elements of the study design should be included below to better enable readers to scrutinize the research adequately, evaluate its methodological rigor, and reproduce the methods or findings.

### Study Design:

| Groups                                         | Sex  | Age        | Number (prior to experiment) | Number (after termination) | Littermates (Yes/No) | Other description |
|------------------------------------------------|------|------------|------------------------------|----------------------------|----------------------|-------------------|
| <i>Cd47</i> <sup>WT</sup>                      | Male | 8-10 weeks | 14                           | 14                         | Yes                  |                   |
| <i>Cd47</i> <sup>ALEC</sup>                    | Male | 8-10 weeks | 13                           | 13                         | Yes                  |                   |
| Wild-type (VEGF-C Matrigel Plug)               | Male | 8-10 weeks | 7                            | 7                          | No                   |                   |
| Wild-type (VEGF-C+TSP1+IgG Matrigel Plug)      | Male | 8-10 weeks | 5                            | 5                          | No                   |                   |
| Wild-type (VEGF-C+TSP1+ CD47-Ab Matrigel Plug) | Male | 8-10 weeks | 7                            | 7                          | No                   |                   |

**Sample Size:** Based on the previous atherosclerosis animal research work by us and others, we calculated that sufficient sample sizes to detect a true experimental difference with a significance level of 0.05.

**Inclusion Criteria:** All mice with appropriate genotypes and age were included in the experiments.

**Exclusion Criteria:** None.

**Randomization:** Eight- to ten-week-old male C57BL/6J mice were randomly divided into three groups (5-7 mice/group) for the Matrigel plug assay.

**Blinding:** All *in vivo* data analysis were performed by a blinded investigator.



1. Singla B, Lin HP, Ahn W, White J, Csanyi G. Oxidatively Modified LDL Suppresses Lymphangiogenesis via CD36 Signaling. *Antioxidants (Basel)*. 2021;10. doi: 10.3390/antiox10020331
2. Singla B, Lin HP, Chen A, Ahn W, Ghoshal P, Cherian-Shaw M, White J, Stansfield BK, Csanyi G. Role of R-spondin 2 in arterial lymphangiogenesis and atherosclerosis. *Cardiovasc Res*. 2020. doi: 10.1093/cvr/cvaa244

**Figure 1A**

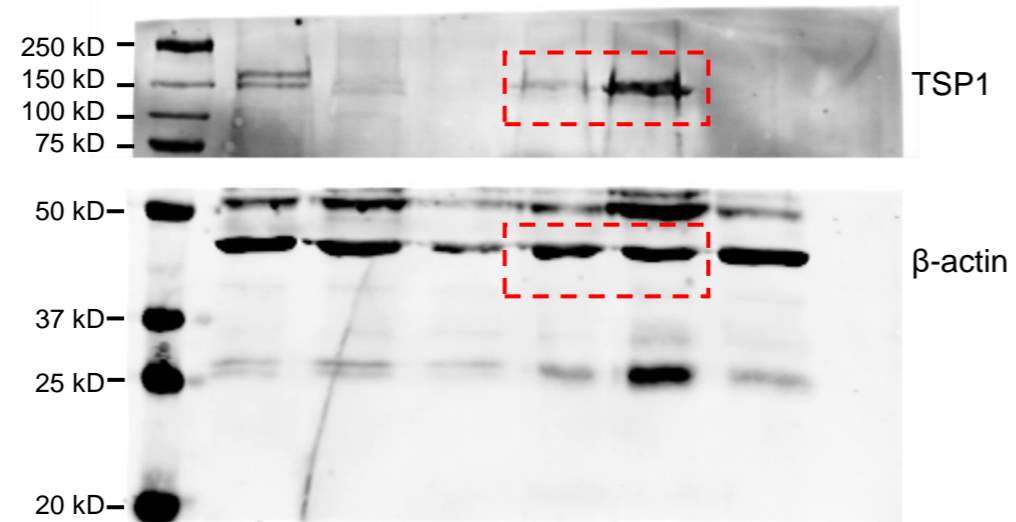

**Figure 4A**

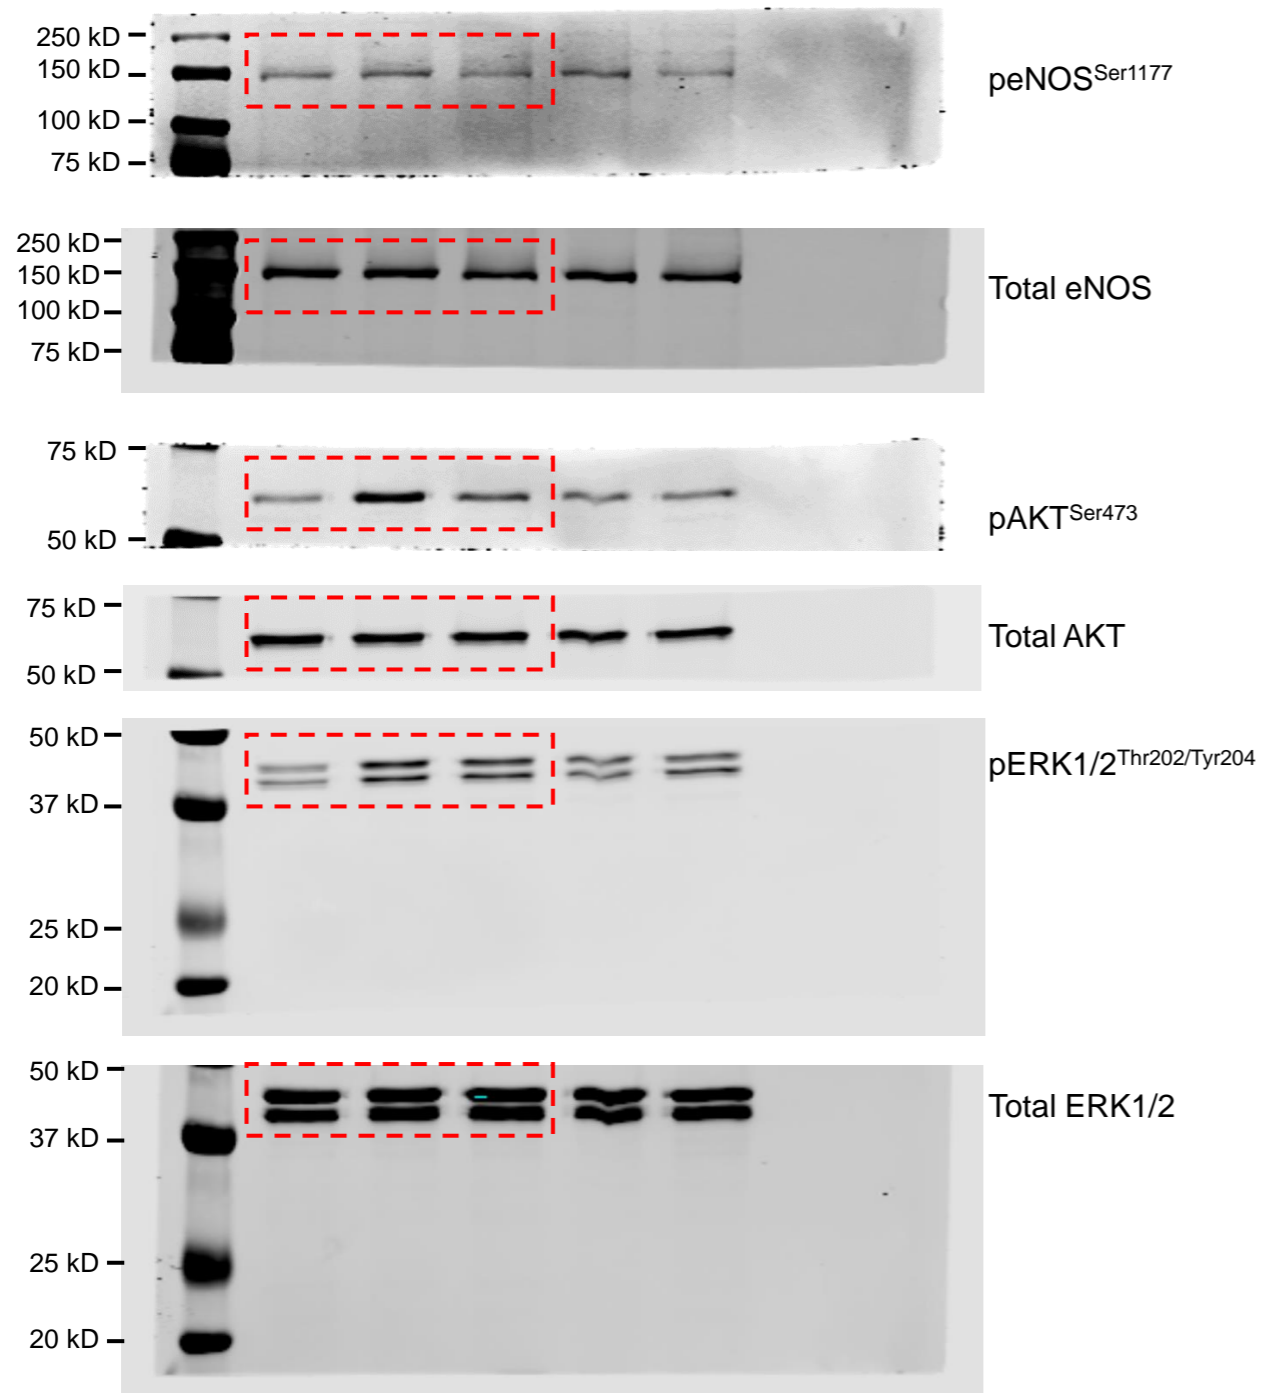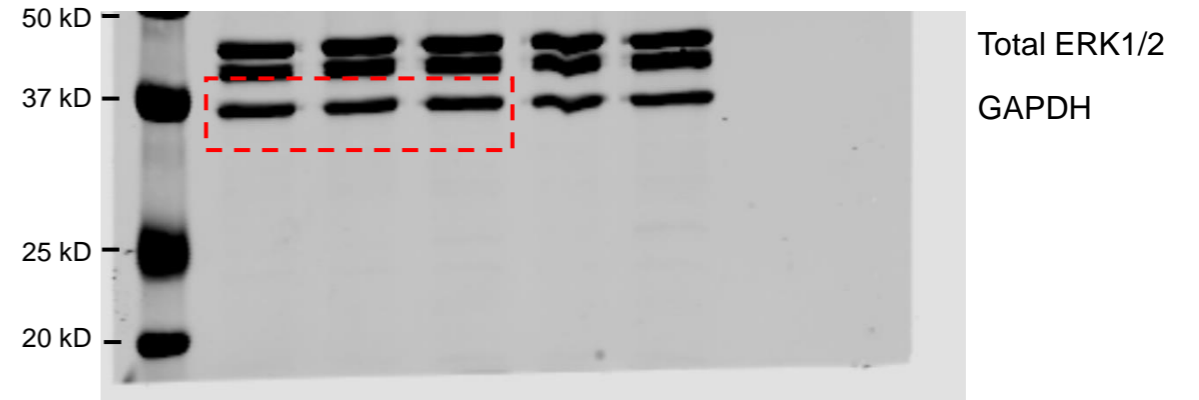

Figure 4E

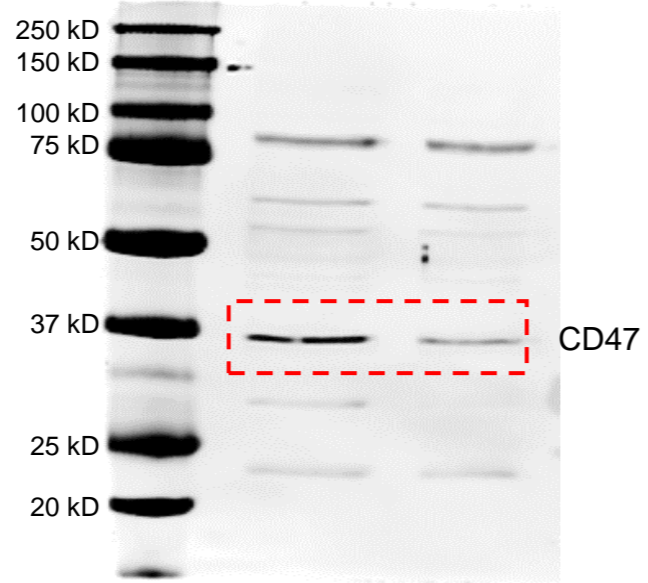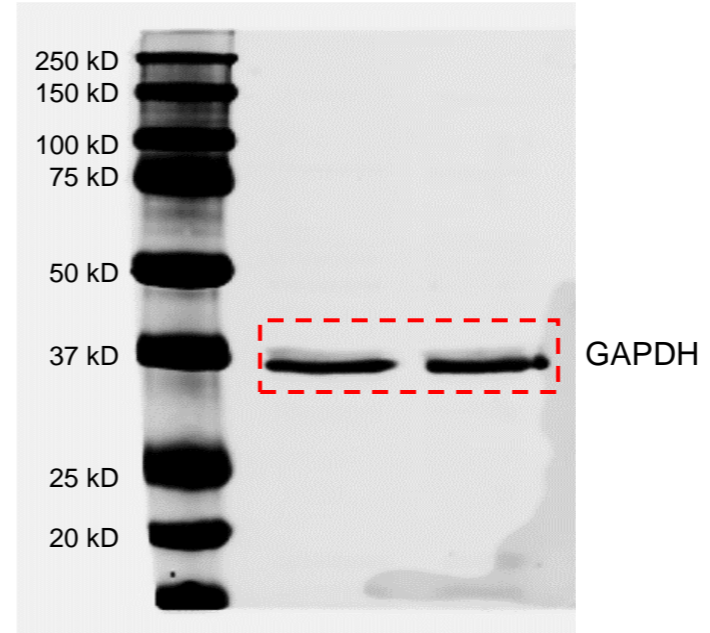

Figure 4F

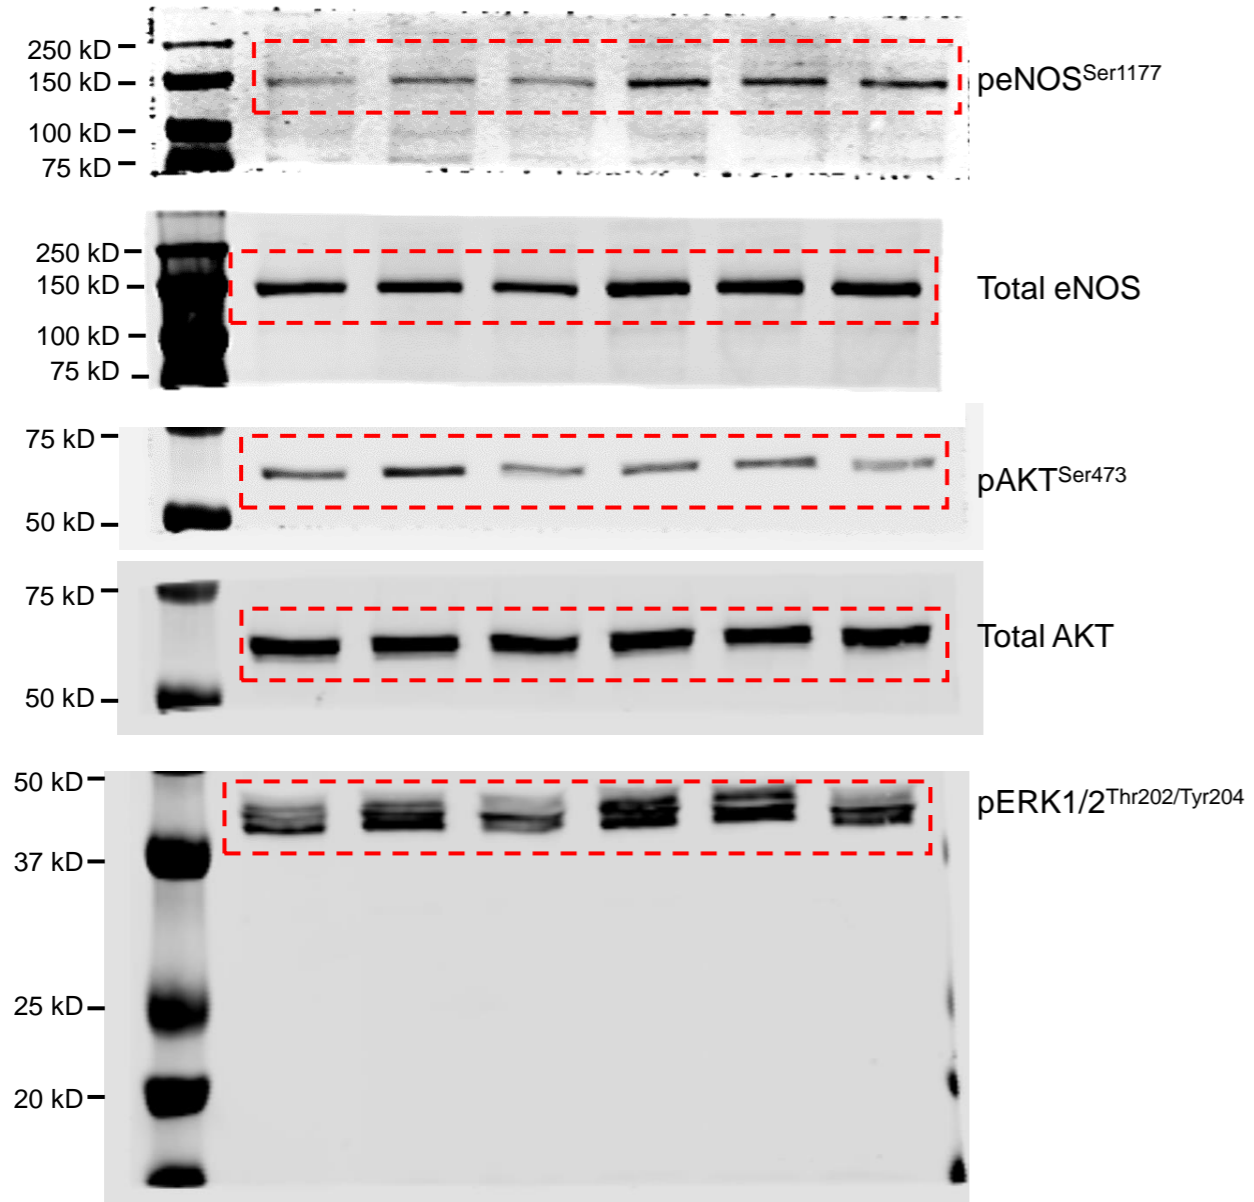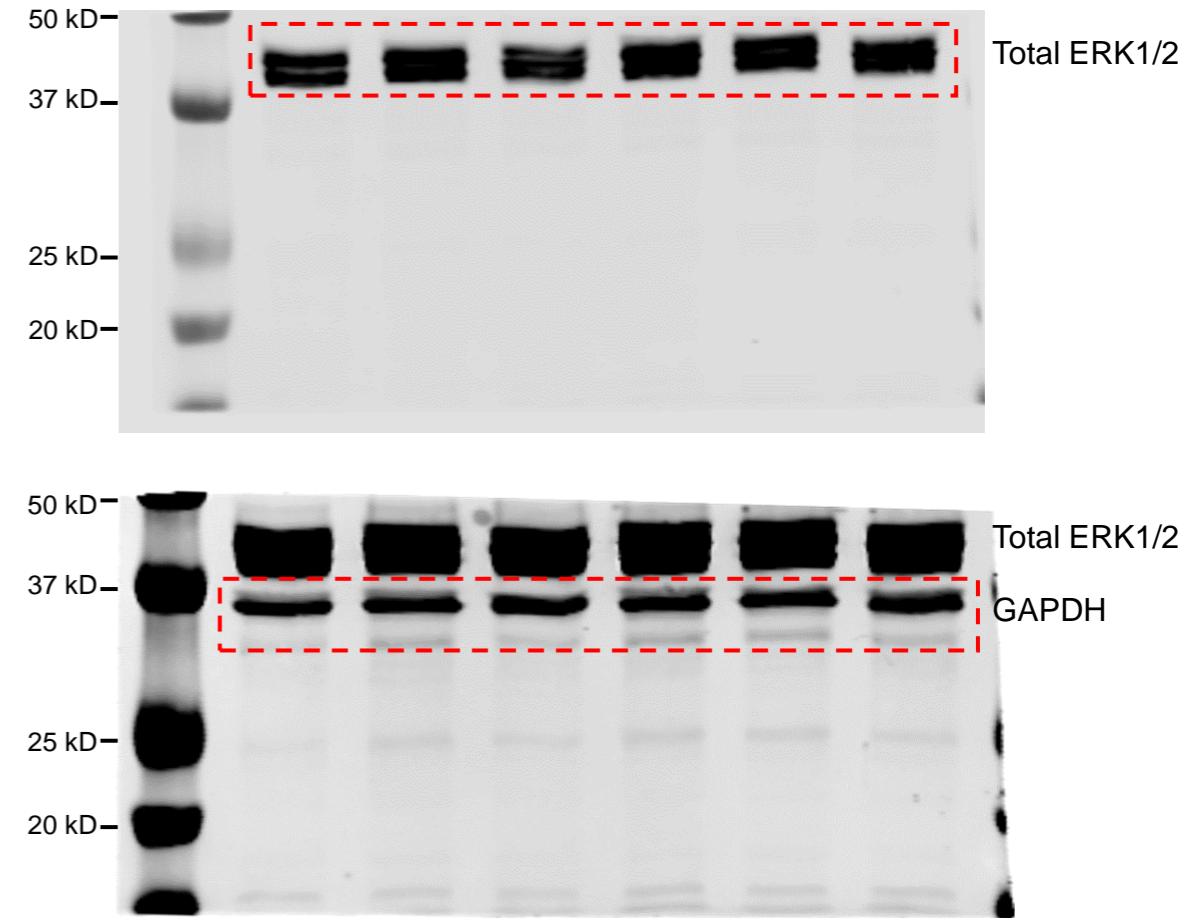

Figure S3

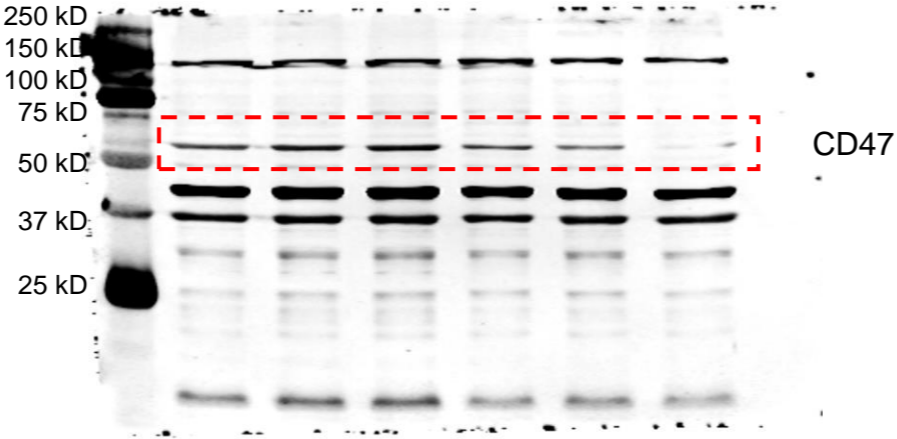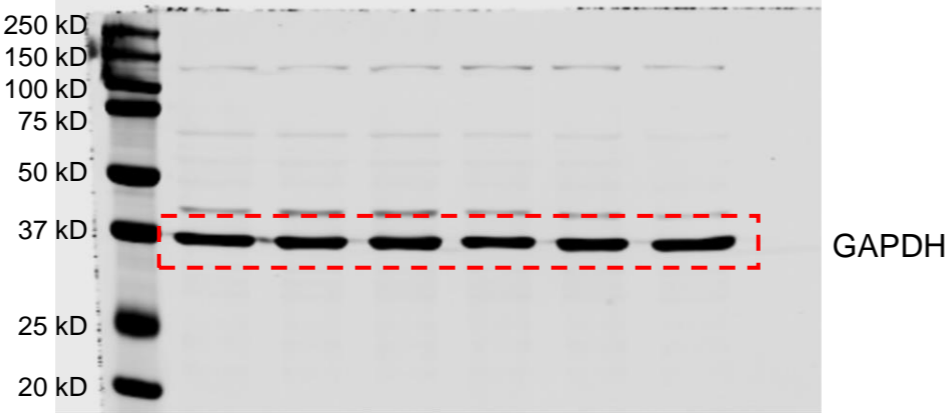

Figure S5

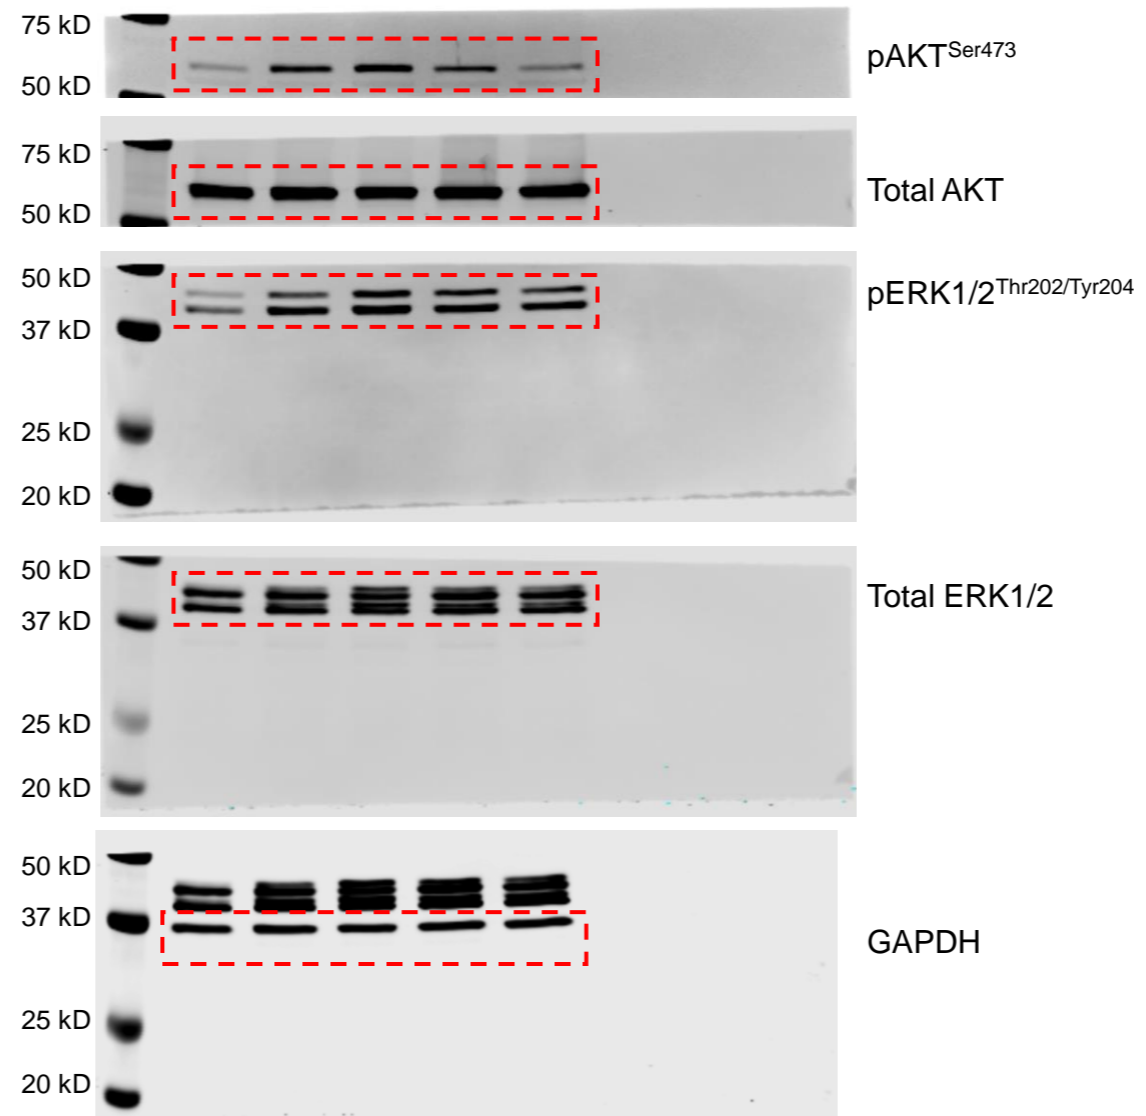

Figure S6C

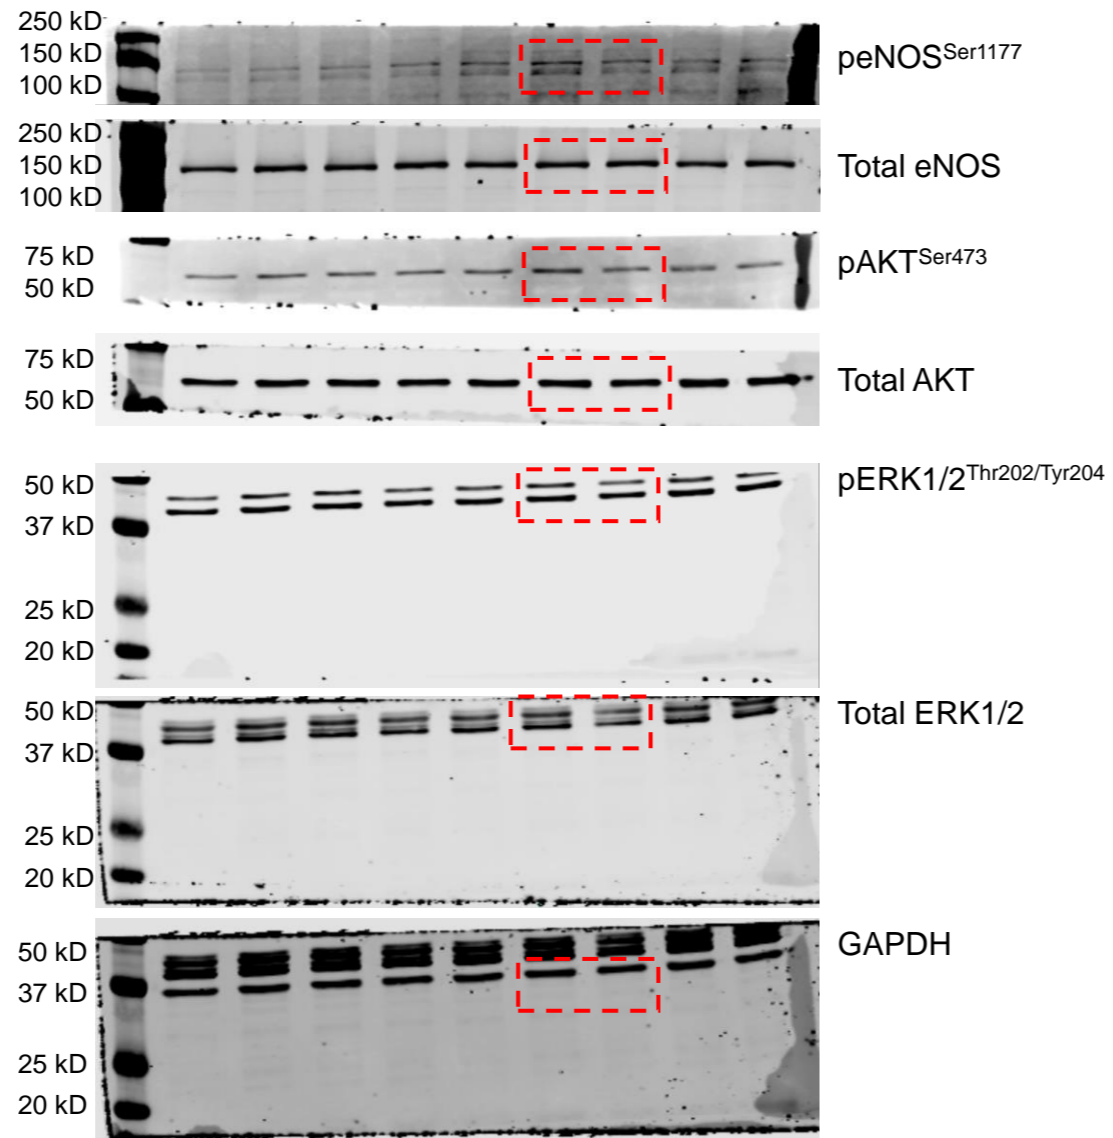



Figure S7

Figure S7A

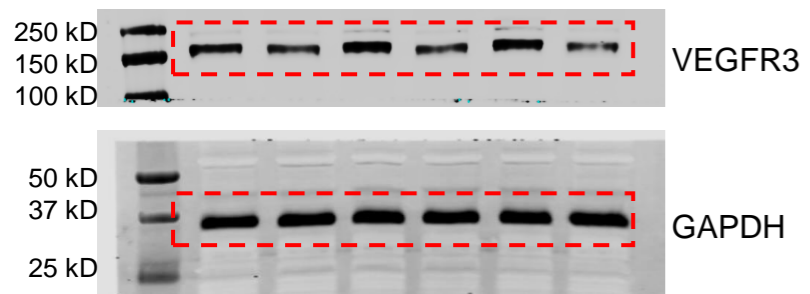

Figure S7C

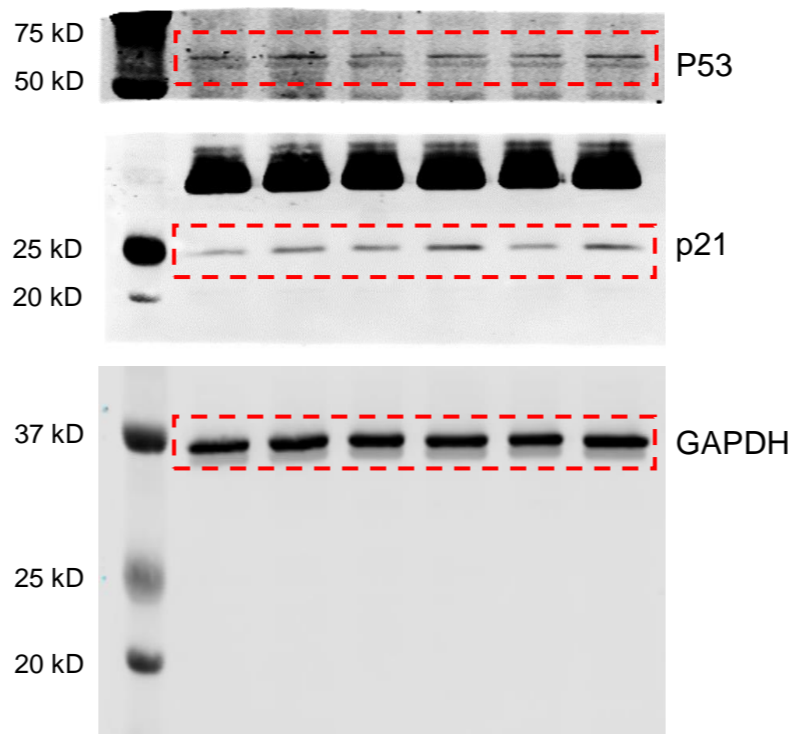

Figure S7D

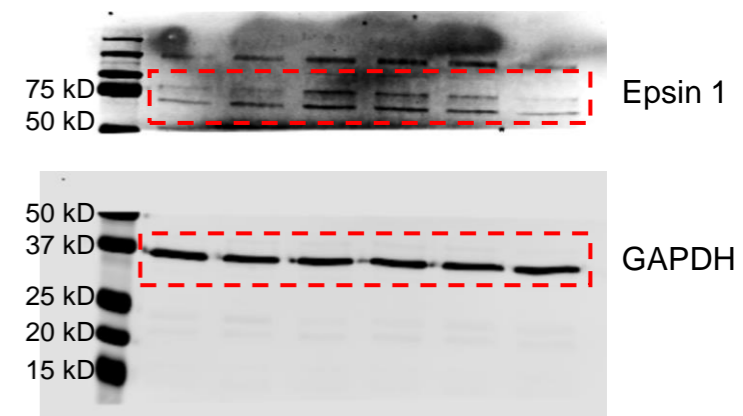

**Figure S8**

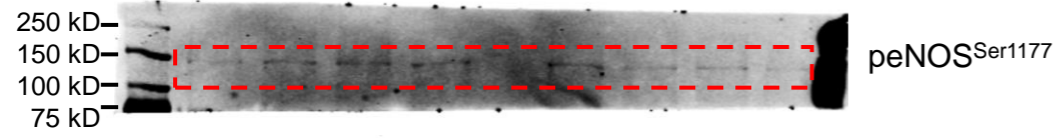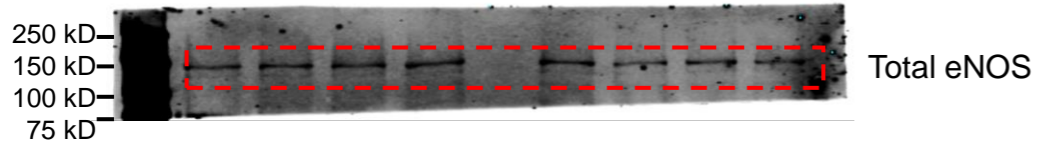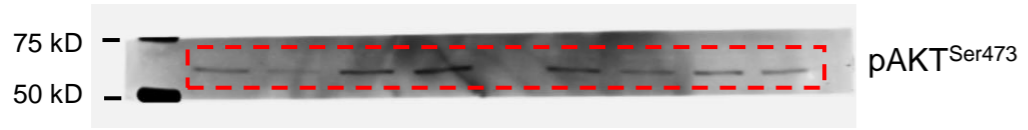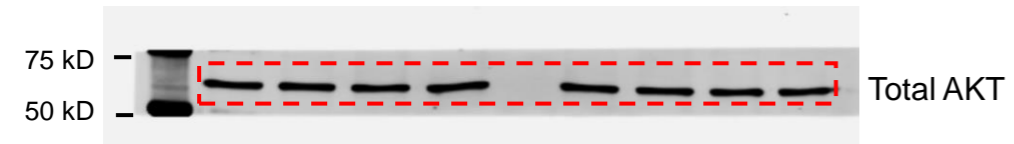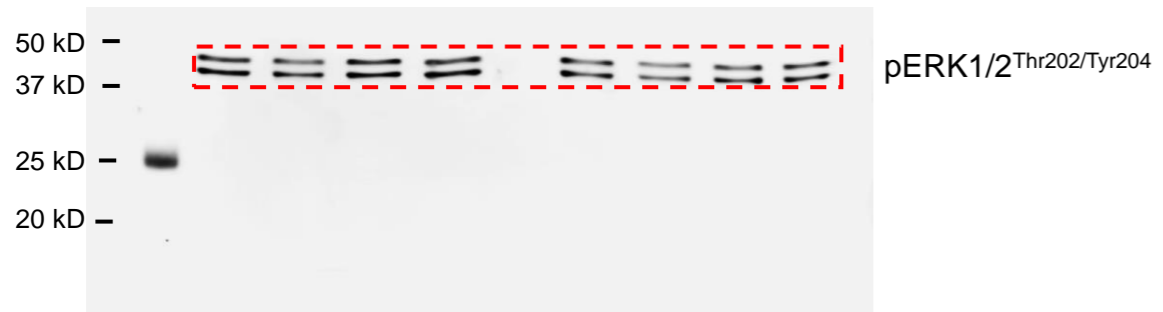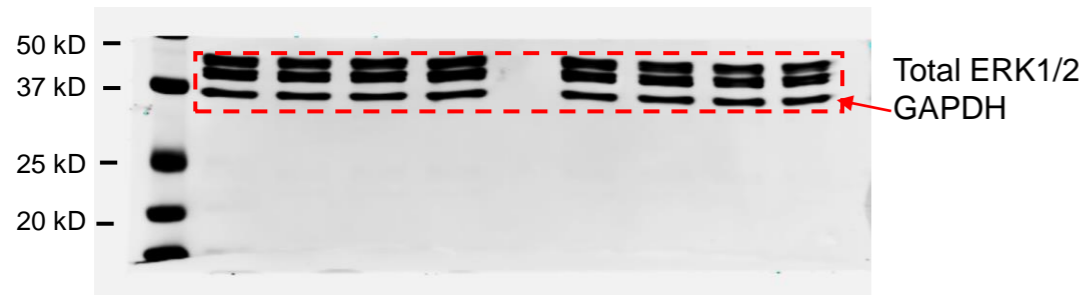

Supplement: atv-43-1234-s001.pdf [file atv-43-1234-s001.pdf]
